# Supplementary material for: Identification of Reference Genes for Reverse Transcription-Quantitative PCR Analysis of Ginger Under Abiotic Stress and for Postharvest Biology Studies
Source: Front Plant Sci. 2022 Jun 6;13:893495. doi: 10.3389/fpls.2022.893495 (PMC9207462; doi:10.3389/fpls.2022.893495)
Supplement: Supplementary Table 1 — FPKM candidate. [file Data_Sheet_1.XLSX]

## Sheet: S1.FPKM Candidate
GeneID	RO2-FPKM	RO3-FPKM	Ye1-FPKM	Gr2-FPKM	Ye3-FPKM	RI1-FPKM	Gr1-FPKM	Ye2-FPKM	RO1-FPKM	Gr3-FPKM	RI3-FPKM	RI2-FPKM	Mean	SD	CV	MFC
MTCONS_00009943	59.81	60.24	51.06	53.33	59.43	52.69	61.66	57.96	62.15	55.38	55.94	58.5	57.3458	3.4803	0.0606896	1.2172
Maker00077394.1	60.04	56.2	48.82	56.35	55.08	60.88	58.51	55.56	57.41	62.55	61.15	56.28	57.4025	3.50093	0.0609892	1.28124
MTCONS_00010202	53.24	52.44	55.22	53.68	59.43	61.59	50.93	51.73	58.13	48.74	58.57	54.43	54.8442	3.69138	0.0673068	1.26364
Maker00069376.1	76.55	71.63	67.68	72.32	68.16	70.06	78.75	64.62	69.27	69.84	70.25	74.11	71.1033	3.74305	0.0526424	1.21866
MTCONS_00037971	89.79	94.62	83.05	87.28	81.61	81.71	86.69	86.65	89.67	86.33	82.99	80.55	85.9117	3.97734	0.0462957	1.17467
MTCONS_00060008	73.88	76.26	77.2	72.98	64.13	72.71	72.39	70.05	73.31	72.72	70.55	63.26	71.62	4.03185	0.056295	1.22036
MTCONS_00051542	58.9	58.17	65.64	60.37	70.2	66.57	59	66.73	59.42	56.04	60.43	62.12	61.9658	4.1264	0.0665916	1.25268
MTCONS_00078691	50.62	53.49	56.6	57.34	56.65	52.83	56.86	47.79	58.78	54.3	52.75	43.73	53.4783	4.19765	0.0784926	1.34416
Maker00019342.1	64.24	65.58	74.66	65.25	72.21	66.83	69.44	70.31	67.32	60.09	62.21	73.31	67.6208	4.29574	0.0635268	1.24247
Maker00015146.1	63.64	66.93	69.04	75.78	64.26	62.08	74.91	65.55	66.3	67.84	75.03	69.75	68.4258	4.45133	0.0650534	1.22068
Maker00077274.1	53.02	55.97	53.39	46.27	48.68	53.51	49.82	56.11	55.84	40.2	49.46	52.19	51.205	4.46656	0.0872291	1.39577
MTCONS_00024575	49.36	49.24	51	51.21	60.99	54.38	51.72	60.6	52.16	46.01	54.99	47.36	52.4183	4.48153	0.0854955	1.32558
Maker00015129.1	86.83	89.32	96.37	87.07	87.38	95.03	88.64	95.22	85.36	82.96	92.5	82.7	89.115	4.4923	0.0504101	1.1653
MTCONS_00084856	64.68	65.16	77.47	67.95	73.53	68.36	72.97	63.45	67.72	59.84	66.92	67.74	67.9825	4.58966	0.0675124	1.29462
MTCONS_00011491	66.34	65.61	63.72	61.37	71.4	59.67	60.49	68.63	67.48	58.69	67.08	54.87	63.7792	4.60881	0.072262	1.30126
MTCONS_00015536	111.2	115.55	102.04	115.95	104.52	115.94	105.06	113.88	112.65	114.64	111.21	108.94	110.965	4.61649	0.0416031	1.13632
MTCONS_00039253	53.36	56.24	54.71	50.34	50.8	56.63	51.45	41.99	55.07	44.87	58.19	49.92	51.9642	4.62056	0.0889183	1.38581
Maker00003514.1	53.94	54.52	64.8	51.68	50.79	53.03	47.12	63.38	54.81	48.49	54.07	54.9	54.2942	4.99711	0.0920376	1.37521
MTCONS_00090417	57.82	49.63	48.39	50.9	55.42	48.13	62.58	48.78	50.6	49.36	52.62	62.7	53.0775	5.10377	0.0961569	1.30272
MTCONS_00016029	47.11	45.39	54.09	47.56	57.11	52.55	48.19	39.92	57.25	44.7	53.17	54.29	50.1108	5.18958	0.103562	1.43412
MTCONS_00073507	64.73	62.49	67.2	66.58	71.73	61.78	66.95	53.62	70.6	60.51	61.59	55.1	63.5733	5.3183	0.0836561	1.33775
Maker00012411.1	43.32	46.63	52.25	53.74	54.35	43.28	59.82	46.05	47.25	46.29	55.54	56.47	50.4158	5.34594	0.106037	1.38216
MTCONS_00019169	51.89	53.55	48.83	63.49	60.42	63.82	56.14	61.38	55.17	60.48	53.72	67.39	58.0233	5.37447	0.0926261	1.38009
MTCONS_00038295	56.28	56.53	61.6	49.93	53.23	60.31	45.89	51.93	58.17	42.15	54.4	54.2	53.7183	5.42717	0.10103	1.46145
MTCONS_00082683	50.29	52.12	62.8	51.77	67.43	51	49.22	50.79	54.92	47.34	54.07	55.79	53.9617	5.55744	0.102989	1.42438
MTCONS_00022457	54.84	54.84	49.68	46.02	56.25	62.15	49.92	47.2	60.39	47.91	62.93	54.6	53.8942	5.59774	0.103865	1.36745
MTCONS_00075391	54.38	59.77	62.87	58.6	55.08	55.35	55.15	41.79	60.28	53.83	53.67	46.33	54.7583	5.61378	0.102519	1.50443
MTCONS_00027952	62.84	63.69	69.53	56.8	64.24	68.66	56.72	56.61	61.66	48.71	63.24	65.26	61.4967	5.6234	0.0914423	1.42743
MTCONS_00067099	63.86	66.38	64.11	64.7	61.45	78.87	62.42	71.45	71.77	61.49	76.83	69.06	67.6992	5.66042	0.0836113	1.28348
Maker00010686.1	45.47	49.59	60.17	53.38	51.51	63.83	53.75	60.21	56.95	55.02	65.99	54.31	55.8483	5.66216	0.101385	1.45129
Maker00042628.1	54.1	52.64	69.88	54.11	62.59	58.51	59.61	49.86	54.78	52.76	56.1	47.84	56.065	5.70173	0.101699	1.4607
MTCONS_00086537	50.51	51.14	60.46	48.38	59.25	53.1	51.67	67.53	49.49	46.96	51.87	57.98	54.0283	5.77933	0.106968	1.43803
MTCONS_00041752	60.26	56.57	66.7	57.13	61.32	56.57	51.55	42.52	51.66	52.01	53.34	54.89	55.3767	5.79353	0.10462	1.56867
MTCONS_00028113	57.86	60.3	71.91	61.92	68.88	72.14	64.29	70.06	63.97	55.37	67.91	74.3	65.7425	5.80651	0.0883219	1.34188
MTCONS_00039054	68.81	68.56	77.21	89.07	73.86	77.15	83.73	71.39	77.9	80.75	82.12	78.47	77.4183	5.85828	0.0756705	1.29915
Maker00021651.1	58.04	55.57	47.25	47.43	51.17	56.86	43.29	48.34	57.24	44.72	59.87	60.23	52.5008	5.86911	0.111791	1.39131
MTCONS_00087476	49.49	54.04	64.36	67.9	63.69	66.72	64.84	53.77	58.66	60.47	68.02	64.73	61.3908	5.87304	0.0956664	1.37442
Maker00022601.1	58.07	52.56	62.16	53.74	43.42	54.41	58.47	44.3	47.36	57.26	47.04	45.8	52.0492	6.02907	0.115834	1.4316
MTCONS_00083361	65.04	67.07	63.92	59.51	72.31	71.87	60	61.31	73.42	53.75	73.18	64.7	65.5067	6.02925	0.0920403	1.36595
Maker00021511.1	46.84	47.09	54.86	62.34	62.08	49.07	59.94	58.8	49.49	60.71	50.46	47.46	54.095	6.04003	0.111656	1.33091
MTCONS_00073980	65.06	64.12	55.96	48.78	65.61	69.61	59.07	57.62	61.8	49.41	62.61	60.99	60.0533	6.04351	0.100636	1.42702
MTCONS_00033950	54.3	59.84	51.63	43.13	46.85	53.25	44.43	46.85	58.46	40.09	53.16	56.52	50.7092	6.07483	0.119797	1.49264
Maker00034453.1	77.77	76.04	64.63	81.23	69.61	76.49	76.27	62.04	81.41	69.1	76.1	68.1	73.2325	6.07715	0.0829843	1.31222
MTCONS_00008218	54.87	60.66	53.15	49.42	52.01	56.9	48.83	45.13	63.5	41.18	47.47	50.98	52.0083	6.07831	0.116872	1.54201
MTCONS_00075592	48.59	49.35	62.86	43.08	58.2	49.76	48.63	47.76	52.14	38.15	48.9	53.58	50.0833	6.11565	0.122109	1.64771
MTCONS_00081062	65.03	56.93	68.48	63.29	72.71	53.89	62.39	57.09	58.12	59.15	60.78	74.14	62.6667	6.12364	0.0977177	1.37577
MTCONS_00012867	75.51	76.05	75.7	59.8	74.41	76.43	66.53	62.3	76.16	61.32	72.81	71.1	70.6767	6.14082	0.0868861	1.27809
MTCONS_00039796	53.32	55.65	46.53	45.3	43.46	58.88	47.38	45.32	63.96	44.57	52.87	51.59	50.7358	6.16511	0.121514	1.4717
MTCONS_00062377	73.79	70.87	81.3	75.8	88.42	84.47	79.92	85.79	67.4	72.5	83.28	77.36	78.4083	6.24497	0.0796468	1.31187
Maker00027178.1	61.28	69.37	57.91	62.02	56.88	67.66	59.24	48.25	60.57	55.3	61.02	47.6	58.925	6.24688	0.106014	1.45735
Maker00053860.1	58.37	50.53	55.84	47.08	43.41	56.92	45.93	49.83	57.11	43.2	50.02	64.03	51.8558	6.27948	0.121095	1.48218
MTCONS_00051830	54.89	62.35	63.46	49.07	60.56	51.2	50.63	61.08	56.67	49.27	44.11	46.67	54.1633	6.30734	0.11645	1.43868
MTCONS_00055256	67.92	72.04	61.82	71.35	67.67	55.37	71.03	72.88	69.59	62.4	58.24	54.74	65.4208	6.34765	0.097028	1.33138
Maker00060690.1	61.84	55.86	61.59	56.39	50.46	41.62	58.27	46.2	54.48	50.12	45.98	46.05	52.405	6.35999	0.121362	1.48582
MTCONS_00014753	57.61	54.33	53.38	49.46	56.82	38.79	50.12	39.32	56.59	45.62	46.88	56.51	50.4525	6.36985	0.126254	1.48518
MTCONS_00071473	48.2	46.47	60.55	44.23	62.11	59.32	44.24	57.64	49.38	45.37	55.18	50.81	51.9583	6.38127	0.122815	1.40425
Maker00061415.1	59.76	64.89	55.14	51.03	50.9	64.58	49.65	55.42	67.01	47.45	61.06	62.39	57.44	6.42113	0.111788	1.41222
Maker00015948.1	64.33	68.53	59.16	51.12	62.78	66	54.62	53.64	63.43	45.96	61.57	62.12	59.4383	6.43074	0.108192	1.49108
MTCONS_00027931	63.71	64.4	64.64	52.11	54.43	59.22	50.7	50.09	57.47	47.02	50.77	45.75	55.0258	6.45152	0.117245	1.4129
MTCONS_00076483	55.48	55.87	64.09	41.93	57.46	52.04	44.52	48.6	56.29	41.15	53.43	50.45	51.7758	6.53168	0.126153	1.55747
MTCONS_00023429	85.05	73.44	69.29	78.11	86.2	75.1	90.53	81.41	75.66	86.99	72.79	73.52	79.0075	6.53185	0.0826738	1.30654
MTCONS_00036305	58.18	55.4	56.35	45.59	46.11	61.94	45.05	41.21	56.48	44.95	54.95	57.14	51.9458	6.53736	0.12585	1.50303
MTCONS_00071168	66.43	59.98	70.38	67.75	63.67	66.72	64.91	70.44	57.03	63.26	60.44	83.63	66.22	6.54879	0.0988944	1.46642
Maker00001133.1	92.86	94.85	98.91	102.58	101.48	91.18	106.5	85.34	99.42	94.44	98.53	83.45	95.795	6.56775	0.0685605	1.27621
Maker00008301.1	73.58	74.75	70.46	77.83	64.65	80.44	77.21	58.7	77.39	73.26	83.96	78.44	74.2225	6.65576	0.0896731	1.43032
MTCONS_00005477	56.88	55.35	56.27	48.8	56.89	45.46	49.49	61.24	57.56	41.17	42.18	43.49	51.2317	6.65734	0.129946	1.48749
MTCONS_00027910	54.56	49.85	48.77	58.2	68.22	47.64	65.27	50.13	46.83	50.13	59.36	54.3	54.4383	6.70868	0.123234	1.45676
MTCONS_00078298	41.22	52.27	63.39	48.18	54.6	52.33	46.96	57.63	51.46	46.15	50.04	65.7	52.4942	6.75579	0.128696	1.59389
MTCONS_00082942	55.56	61.9	74.38	62.64	75.59	71.24	59.69	61.72	65.6	54.07	70.96	68.51	65.155	6.76816	0.103878	1.398
MTCONS_00083800	81.86	80.67	86.45	78.95	91.17	81.22	88.9	73.62	82.78	71.12	89.96	69.99	81.3908	6.80415	0.0835984	1.30261
MTCONS_00061107	68.08	65.91	65.98	65	79.16	57.13	64.55	71.22	70.58	56.1	60.95	53.86	64.8767	6.85124	0.105604	1.46974
MTCONS_00029991	65.22	63.65	69.58	53.04	64.91	68.78	56.6	55.27	74.18	51.24	60.57	66.71	62.4792	6.86369	0.109856	1.4477
MTCONS_00029527	68.6	68.91	56.55	54.03	58.81	67.06	51.26	54.26	64.88	49.67	63.08	68.48	60.4658	6.89687	0.114062	1.38736
MTCONS_00092456	65.78	67.34	70.41	49.83	63.97	63.74	49.99	67.22	61.25	50.3	61.36	58.8	60.8325	6.9028	0.113472	1.413
MTCONS_00046332	56.46	63.69	53.32	46.39	56.46	60.81	47.23	53.3	67.68	45.35	63.53	56.23	55.8708	6.90912	0.123662	1.49239
MTCONS_00055534	76.64	75.03	66.53	64.05	86.7	65.56	77.67	66.23	80.07	65.41	72.09	67.55	71.9608	6.9233	0.0962092	1.35363
Maker00005980.1	65.97	63.07	76.1	57.45	60.41	67	58.22	70.77	67.13	49.77	61.62	72.04	64.1292	6.93772	0.108184	1.52903
MTCONS_00011680	59.14	59.72	56.49	43.75	63.46	53.28	45.53	56.71	59.38	41.15	51.4	46.84	53.0708	6.95957	0.131137	1.54216
MTCONS_00016531	62.57	66.09	65.05	61.32	71.92	73.91	67.2	48.86	70.74	61.19	69.2	53.95	64.3333	7.04228	0.109466	1.51269
MTCONS_00040753	77.09	75.38	70.37	68.11	68.81	93.27	75.46	75.96	77.05	68.41	85.35	78.34	76.1333	7.05431	0.0926573	1.3694
MTCONS_00094125	72.62	73.11	81.49	61.23	73.06	72.27	61.41	76.8	77.8	57.85	66.51	74.98	70.7608	7.06229	0.099805	1.40864
Maker00006216.1	54.14	53.53	55.47	44.7	56.16	49.03	56.77	35.03	54.63	38.97	57.13	54.18	50.8117	7.07067	0.139155	1.63089
Maker00005831.1	64.35	67.87	77.25	71.2	77.38	78.03	70.14	58.16	71.29	64.89	81.23	82.16	71.9958	7.09205	0.0985065	1.41265
MTCONS_00089432	52.39	53.39	50.9	47.4	68.09	42.14	51.16	49.8	56.73	43.79	39.87	47.83	50.2908	7.10255	0.14123	1.7078
MTCONS_00054923	67.38	64.3	63.17	51.87	56.42	73.14	53.54	52.53	58.09	48.99	65.21	65.37	60.0008	7.14702	0.119115	1.49296
MTCONS_00090873	58.25	60.05	54.76	57.13	71.03	52.66	61.32	43.39	65.51	52.09	62.71	49.86	57.3967	7.15131	0.124594	1.63701
MTCONS_00045842	77.74	83.97	78.68	85.5	78	98.34	81.76	76.74	95.01	80.12	94.65	85.07	84.6317	7.15982	0.0845997	1.28147
MTCONS_00007561	58.02	66.18	49.9	72.09	58.92	63.68	64.93	55.46	64.42	69.03	70.93	50.32	61.99	7.16845	0.115639	1.44469
Maker00069511.1	50.71	55.9	61.61	44.48	56.36	54.1	46.66	47.71	43.64	33.94	48.9	56.57	50.0483	7.17029	0.143267	1.81526
MTCONS_00025110	82.79	81.59	83.79	78.96	64.2	93.37	77.22	75.38	80.61	81.93	73.2	89.2	80.1867	7.17511	0.0894801	1.45436
Maker00038948.1	48.15	57.03	66.98	46.1	66.32	54.6	47.97	56.52	51.06	42.45	57.51	54.57	54.105	7.20941	0.133248	1.57786
MTCONS_00044586	70.11	70.45	67.61	67.97	65.24	59.9	68.83	54.85	67.14	62.5	63.49	44.43	63.5433	7.22253	0.113663	1.58564
Maker00024902.1	68.65	58.27	43.64	48.39	50.13	49.34	53.36	46.2	62.14	52.08	44.66	46.4	51.9383	7.26599	0.139896	1.5731
Maker00077513.1	59.24	62.02	56.42	50.4	42.75	48.91	55.08	41.68	62.66	40.72	49.33	50.39	51.6333	7.27436	0.140885	1.5388
Maker00050917.1	66.26	68.09	69.83	61.37	68.23	55.08	58.03	81.69	69.06	62.75	53.65	67.4	65.12	7.30053	0.112109	1.52265
MTCONS_00009217	54.99	50.79	53.68	43.34	68.43	55.62	46.31	62.68	51.95	44.83	62.24	57.91	54.3975	7.30257	0.134245	1.57891
MTCONS_00057118	56.48	56.84	46.28	42.5	49.49	57.56	47.64	45.78	64.29	37.24	56.47	49.07	50.8033	7.31243	0.143936	1.72637
MTCONS_00094630	58.88	62.04	61.81	45.94	67.17	53.86	47.52	65.35	61.14	44.6	61.21	54.36	56.99	7.31932	0.128432	1.50605
MTCONS_00069453	49.78	60.17	49.47	50.69	56.56	69.02	45.54	58.58	58.79	50.74	64.95	67.09	56.7817	7.3259	0.129019	1.51559
Maker00020530.1	56.69	55.24	57.01	69.09	65.04	54.19	63.04	72.92	53.13	66.5	58.96	46.06	59.8225	7.33133	0.122551	1.58315
Maker00010004.1	45.09	43.83	57.38	48.77	67.57	58.87	48.66	51.22	53.7	46.75	59.65	41.76	51.9375	7.3544	0.141601	1.61806
MTCONS_00081767	50.8	51.08	61.07	58.36	65.8	42.62	62.22	42.82	54.91	53.49	47.5	45.59	53.0217	7.36912	0.138983	1.54388
MTCONS_00023175	54.64	55.69	53	39.68	60.01	51.89	44.22	59.03	55.78	36.02	56.26	46.87	51.0908	7.36933	0.14424	1.66602
MTCONS_00087190	63.14	67.71	56.59	66.22	58.44	49.73	67.83	43.78	69.82	59.81	57.55	58.4	59.9183	7.39862	0.123478	1.59479
Maker00058214.1	64.41	70.47	60.62	52.84	68.96	65.97	57.6	57.8	71.06	50.66	72.25	72.87	63.7925	7.41566	0.116247	1.43841
Maker00013357.1	73.83	66.75	78.7	59.52	80.01	66.39	63.18	72.76	72.27	53.35	67.6	72.81	68.9308	7.4186	0.107624	1.49972
MTCONS_00067187	109.12	109.65	98.43	108.85	111.17	105.33	103.59	110.86	118.54	92.95	95.94	96.07	105.042	7.42424	0.070679	1.27531
Maker00037987.1	60.85	55.92	74.37	62.62	74.39	56.14	70.12	53.26	61.22	56.98	51.67	58.4	61.3283	7.42702	0.121103	1.43971
Maker00015815.1	73.61	77.86	69.93	62.38	67.16	59.8	58.41	56.59	75.45	55.98	64.34	73.65	66.2633	7.43422	0.112192	1.39085
Maker00070941.1	53.54	51.24	57.01	60.66	73.88	52.41	68.24	48.11	57.74	56.07	56.81	47.22	56.9108	7.45497	0.130994	1.56459
Maker00025121.1	60.85	64.53	45.49	53.2	52.47	52.07	57.63	61.11	75.52	53.63	51.68	59.22	57.2833	7.45639	0.130167	1.66015
MTCONS_00034372	59.71	55.86	47.14	52.76	64.08	64.26	62.88	39.81	61.27	63.06	59.5	64.72	57.9208	7.45752	0.128754	1.62572
MTCONS_00061282	69.4	73.19	77.37	87.74	78.24	66.83	92.05	68.97	74.39	82.39	76.07	69.6	76.3533	7.47318	0.0978763	1.37738
MTCONS_00056347	68.98	70.22	64.87	70.01	71.88	65.81	72.93	46.86	67.19	68.74	67.79	52.82	65.675	7.51439	0.114418	1.55634
Maker00061425.1	77.2	74.79	63.34	68.96	68.29	81.48	60.08	65.78	79.29	63.02	81.91	78.61	71.8958	7.52233	0.104628	1.36335
MTCONS_00060880	54.2	52.85	55.82	51.24	61	64.55	46.54	39.5	60.3	49.32	61.73	42.7	53.3125	7.53801	0.141393	1.63418
Maker00036596.1	54.51	59.5	46.58	38.94	54.73	53.52	43.03	57.93	59.41	38.22	58.01	46.81	50.9325	7.5391	0.148021	1.55678
Maker00050839.1	64.91	63.74	49.93	54.35	49.63	49.95	50.16	48.4	71.3	49.02	48.63	49.55	54.1308	7.55377	0.139546	1.47314
MTCONS_00004795	76.74	72.89	77.75	56.19	69.95	78.19	59.68	63.09	75.94	58.41	67.45	68.78	68.755	7.55474	0.109879	1.39153
Maker00026870.1	67.1	58.42	79.55	71.37	78.56	80.07	77.33	68.59	64.34	66.51	85.63	74	72.6225	7.57168	0.104261	1.46577
MTCONS_00050107	56.85	61.8	55.69	45.76	47.07	64.43	43.58	45.94	63.7	46.48	61.32	58.46	54.2567	7.60148	0.140102	1.47843
Maker00035220.1	63.81	64.33	63.63	76	57.12	78.07	70.07	55.58	67.2	73.52	68.3	52.79	65.8683	7.64013	0.115991	1.47888
Maker00009113.1	54.36	55.56	52.11	54.46	63.74	47.74	58.88	37.94	58.85	52.73	48.01	37.36	51.8117	7.65169	0.147683	1.7061
Maker00009463.1	63.34	61.31	49.66	72.2	52.97	54.44	71.87	56.43	67.65	64.59	50.62	66.67	60.9792	7.65486	0.125532	1.45389
MTCONS_00069315	64.97	58.84	47.11	44.91	45.84	45.47	45.22	51.44	64.76	42.83	44.3	47.62	50.2758	7.669	0.152539	1.51693
MTCONS_00073196	67.06	62.82	71.71	59.47	84.17	61.74	63.33	71.92	70.96	62.55	60.26	80.55	68.045	7.68073	0.112877	1.41534
MTCONS_00031991	46.97	44.2	68.91	58.45	61.15	59.36	59.29	49.38	42.16	56.54	61.97	55.86	55.3533	7.68327	0.138804	1.63449
Maker00069302.1	56.23	54.24	61.18	50.47	67.77	62.06	54.91	67.05	62.57	47.83	75.32	66.77	60.5333	7.70101	0.127219	1.57474
MTCONS_00069836	63.26	60.99	69.43	47.66	55.45	56.73	49.52	55.14	63.4	40	50.23	55.82	55.6358	7.7114	0.138605	1.73575
MTCONS_00076973	50.99	57.19	74.51	57	63.24	62.9	52.05	67.44	58.71	52.28	59.77	74.74	60.9017	7.71852	0.126737	1.46578
MTCONS_00075209	62.44	67.63	51.47	47.26	47.59	53.5	53.33	44.21	66.61	46.8	47.48	49.04	53.1133	7.71902	0.145331	1.52974
Maker00060480.1	83.58	96.04	86.47	82.38	92.52	92.31	80.5	76.17	93.54	74.44	94.16	98.66	87.5642	7.73076	0.0882868	1.32536
MTCONS_00069370	52.64	55.96	66.72	46.76	65.87	49.9	51.52	44.49	56.93	40.51	55.03	45.17	52.625	7.75195	0.147305	1.647
MTCONS_00069772	74.83	75.96	62.46	73.95	75.76	58.52	70.17	88.68	82.35	69.96	68.17	69.88	72.5575	7.76016	0.106952	1.51538
MTCONS_00029845	52.2	55.41	53.02	64.32	54.01	47.03	74.16	42.41	56.23	52.46	60.14	58.4	55.8158	7.78279	0.139437	1.74864
MTCONS_00077871	60.95	58.81	81.41	63.49	73.92	60.14	68.86	56.83	62.28	53.39	64.23	54.31	63.2183	7.80005	0.123383	1.52482
Maker00071193.1	63.92	65.19	54.66	53.5	56.87	59.8	55.91	46.26	74.81	44.5	57.01	55.59	57.335	7.80581	0.136144	1.68112
Maker00065338.1	99.97	99.34	107.38	111.06	107.93	101.87	109.03	100.35	100.14	104.91	94.83	80.32	101.427	7.84738	0.0773693	1.38272
MTCONS_00049411	53.83	61.01	52.36	56.15	61.19	50.76	55.79	32.26	63.27	48.07	50.34	48.63	52.805	7.85653	0.148784	1.96125
Maker00071386.1	50.23	49.56	63.2	51.13	72.9	48.47	56.83	47.2	56.29	44.57	53.64	44.66	53.2233	7.86945	0.147857	1.63563
MTCONS_00091011	101.75	87.78	80	91.22	104.16	94.16	94.09	99.81	103.62	89.57	79.91	95.11	93.4317	7.89276	0.0844763	1.30347
Maker00045012.1	51.91	52.04	65.49	58.19	64.61	49.72	60.4	42.14	61.32	52.36	50.16	39.49	53.9858	7.91545	0.146621	1.65839
MTCONS_00089763	49.61	50.64	57.72	52.32	68.52	58.3	51.94	73.96	53.87	47.17	65.64	52.66	56.8625	7.98338	0.140398	1.56795
MTCONS_00012109	52.18	57.31	68.01	48.38	69.01	57.62	49.51	60.37	59.01	41.07	63.38	63.16	57.4175	7.98591	0.139085	1.6803
MTCONS_00049964	72.68	74.98	76.39	60.16	81.21	85.67	64.29	66.5	73.24	58	70.38	64.29	70.6492	7.99946	0.113228	1.47707
MTCONS_00001721	48.72	64.94	66.24	55.54	74.89	64.54	60.22	48.86	62.89	56.99	68.84	49.97	60.22	8.02351	0.133237	1.53715
MTCONS_00014785	62.91	62.52	50.37	49.01	49.39	53.28	50.27	40.87	70.13	43.05	54.18	52.07	53.1708	8.02975	0.151018	1.71593
Maker00060810.1	68.92	71.51	66.07	73.14	71.4	86.64	71.65	85.57	76.67	75.62	83.07	93.86	77.01	8.05846	0.104642	1.42061
Maker00003353.1	53.1	55.56	81.88	66.17	62.84	73.74	58.44	64.5	53.32	60.71	68.1	65.77	63.6775	8.09014	0.127049	1.542
MTCONS_00066179	82.47	88.33	74.88	90.9	74.21	76.22	87.41	68.8	92.36	85.8	81.14	67.44	80.83	8.09254	0.100118	1.36951
Maker00057977.1	66.2	63.86	60.18	51.42	59.37	67.26	52.14	45.3	63.91	45.57	69.23	51.67	58.0092	8.10605	0.139737	1.52826
MTCONS_00075980	58.42	63.07	57.73	54.23	69.46	51.5	69.38	43.6	61.58	55.38	54.02	43.16	56.7942	8.10818	0.142764	1.60936
Maker00058129.1	86.92	94.92	79.37	83.84	69.14	94.91	86.26	76.75	85.73	89.89	86.31	100.09	86.1775	8.12283	0.094257	1.44764
Maker00054457.1	50.97	54.38	52.72	40.25	57.18	62.99	42.96	64.79	61.07	43.91	62.64	61.09	54.5792	8.17491	0.149781	1.60969
Maker00023193.1	60.04	53.81	54.87	47.18	62.81	43.53	54.16	43.84	62.52	44.4	47.43	35.34	50.8275	8.21386	0.161603	1.77731
Maker00006016.1	57.56	53.79	64.11	51.85	62.62	55.88	47.27	51.6	54.2	38.22	53.42	34.83	52.1125	8.27932	0.158874	1.84065
MTCONS_00007209	71.2	77.93	77.5	59.11	75.98	75.28	63.93	64.41	77.37	54.99	74.25	57.12	69.0892	8.28914	0.119977	1.41717
Maker00009972.1	90.96	82.03	93.27	89.32	92.2	70.99	101.03	82.73	96.65	79.04	82	78.93	86.5958	8.30743	0.0959334	1.42316
Maker00057961.1	96.41	105.46	92.57	86.23	91.45	99.16	86.2	107.11	110.19	84.61	89.98	90.82	95.0158	8.31452	0.0875067	1.30233
Maker00047025.1	86.93	82.9	88.18	83.89	111.3	85.09	87.42	82.4	87.64	77.84	94.2	79.3	87.2575	8.35665	0.09577	1.42986
Maker00000701.1	47.81	48.47	50.86	42.48	47.47	67.81	40.22	42.86	53.48	42.47	64.89	53.7	50.21	8.35831	0.166467	1.68598
MTCONS_00045265	60.74	67.28	76.15	62.54	71.77	53.02	67.13	53.14	60.99	49.92	63.02	48.18	61.1567	8.37324	0.136915	1.58053
Maker00037091.1	65.41	66.42	43.46	65.43	45.47	57.37	60.3	50.56	67.04	63.74	58.21	47.06	57.5392	8.3781	0.145607	1.54257
Maker00053542.1	104.15	101.28	120.3	106.58	113	113.92	107.23	91.32	110.01	91.67	112.98	102.09	106.211	8.38736	0.0789689	1.31735
MTCONS_00086556	63.82	57.95	58.68	41.92	63.19	48.31	43.02	54.94	53.91	37.3	53.56	61.72	53.1933	8.41141	0.158129	1.71099
Maker00060884.1	57.31	61.82	48.58	53.63	42.02	50.34	46.86	63.54	71.16	61.86	46.22	48.25	54.2992	8.41274	0.154933	1.69348
MTCONS_00029500	56.6	65.27	48.48	47.61	53.42	64.66	48.09	41.17	65.16	42.54	62.55	50.34	53.8242	8.46851	0.157337	1.58538
Maker00016217.1	62.67	63.76	48.37	51.37	47.04	64.8	53.08	38.27	67.5	50.59	62.31	53.99	55.3125	8.48854	0.153465	1.76378
Maker00011269.1	66.38	61.68	66.4	46.6	52.66	67.96	43.73	55.44	58.79	41.93	57.78	61.76	56.7592	8.54776	0.150597	1.6208
MTCONS_00054419	44.69	44.42	64.49	66.05	68.49	50.71	61.9	60.25	50.84	65.92	56.45	46.61	56.735	8.55802	0.150842	1.54187
Maker00003463.1	70.51	72.6	84.5	73.93	53.3	79.67	75.62	60.33	66.57	64.04	68.52	80.87	70.8717	8.60583	0.121428	1.58537
Maker00009864.1	65.36	66.36	51.07	45.47	44.22	55.65	49.66	43.61	66.23	42.47	52.22	47.43	52.4792	8.60918	0.164049	1.56251
MTCONS_00063221	88.77	86.94	91.94	74.83	88.06	78.42	76.78	66.06	88.87	69.97	83.41	68.47	80.21	8.61123	0.107359	1.39177
Maker00020558.1	64.38	56.12	49.85	45.03	66.8	55.51	53.72	41.69	64.69	41.92	57.44	44.31	53.455	8.61213	0.16111	1.6023
Maker00035679.1	98.73	100.07	97.93	82.59	90	97.8	89	84.35	98.54	76.08	95.69	108.23	93.2508	8.63021	0.0925483	1.42258
Maker00047062.1	81.45	79.57	93.03	80.05	82.36	100.68	93.91	71.02	82.65	82.79	98.52	78.14	85.3475	8.6484	0.101332	1.41763
MTCONS_00054781	54.51	56.95	69.22	59.21	74.11	62.67	57.64	83.2	57.58	56.18	67.23	53.81	62.6925	8.65616	0.138073	1.54618
Maker00022625.1	84.59	76.71	70.14	64.98	67.38	86.27	69.36	66.29	89.37	63.26	82.26	75.13	74.645	8.69483	0.116482	1.41274
MTCONS_00094032	44.62	52.49	66.32	50.95	60.03	74.56	51.73	58.36	58.24	55.15	71.07	68.2	59.31	8.70133	0.146709	1.671
MTCONS_00003844	55.56	58.81	67.87	50.43	67.49	72.19	52.39	64.41	64.21	48.78	75.77	71.47	62.4483	8.70173	0.139343	1.5533
MTCONS_00009024	55.97	53.7	50.89	35.63	44.65	64.09	42.31	44.86	62.29	39.52	58.32	53.83	50.505	8.71317	0.172521	1.79877
MTCONS_00000092	61.83	57.07	65.95	42.35	62.55	63.61	49.39	54.14	59.82	38.66	60.83	67.04	56.9367	8.74822	0.153648	1.73409
MTCONS_00050476	54.08	59.6	72.15	46.7	59.89	61.95	48.25	42.42	59.28	39.89	56.77	57.91	54.9075	8.75205	0.159396	1.80872
MTCONS_00032512	75.57	82.5	87.74	65.94	67.69	80.21	63.02	79.66	75.15	61.54	78.68	88.5	75.5167	8.75864	0.115983	1.43809
Maker00023220.1	67.89	63.4	75.79	62.38	83.48	68.11	62.44	52.76	66.94	60.15	76.96	53.65	66.1625	8.77823	0.132677	1.58226
Maker00069036.1	59.04	43.8	50.98	48.36	70.47	70.78	58.14	51.57	52.42	58.19	71.05	52.96	57.3133	8.78609	0.153299	1.62215
MTCONS_00041006	65.57	71.67	83.43	66.08	92.02	71.44	66.57	65.86	76.26	57.5	76.84	72.82	72.1717	8.79197	0.12182	1.60035
MTCONS_00034737	43.8	46.33	49.43	68.69	47.14	50.6	64.93	41.77	45.91	62.49	47.73	42.2	50.9183	8.80023	0.17283	1.64448
Maker00004695.1	53.31	55.07	71.7	42.93	66.85	52.44	47.74	54.8	55.24	38.02	53.68	46.81	53.2158	8.87955	0.166859	1.88585
Maker00040261.1	78.51	85.43	89.21	70.85	95.36	83.26	74.08	93.5	86.83	65.12	86.48	75	81.9692	8.90986	0.108698	1.46437
MTCONS_00072527	41.12	47.06	56.14	46.93	63.05	57.33	46.89	67.73	42.07	41.06	55.61	62.73	52.31	8.92085	0.170538	1.64954
Maker00026645.1	68.23	74.14	60.69	47.08	67.98	59.31	56.35	54.04	73.28	45.63	59.98	66.24	61.0792	8.92512	0.146124	1.62481
Maker00011274.1	48.59	43.99	51.69	41.03	76.02	51.94	51.2	48.17	49.99	40.95	59.07	52.07	51.2258	8.93233	0.174372	1.85641
Maker00003317.1	51.48	53.86	40.08	60.6	47.13	44.07	64.88	38.54	62.26	61.54	46.18	42.1	51.06	8.99538	0.176173	1.68345
Maker00004452.1	63.08	60.99	77.93	60.84	78.83	60.44	71.61	63.94	61.4	61.97	59.24	43.11	63.615	9.00281	0.14152	1.82858
Maker00038740.1	63.31	57.31	59.31	43.45	51.14	68.33	44.85	44.71	61.19	38.76	61.59	50.36	53.6925	9.01093	0.167825	1.7629
Maker00056808.1	74.59	69.59	77	61.1	54.62	53.74	67.37	49.48	68.2	56.04	51.54	68.97	62.6867	9.02082	0.143903	1.55618
MTCONS_00056646	57.38	56.58	70.45	80.3	67.42	53.6	76.26	52.39	61.32	71	63.22	75.85	65.4808	9.04631	0.138152	1.53274
Maker00029477.1	75.85	63.43	67.69	55.88	77.01	78.43	56.53	71.97	71.09	48.91	74.37	65.04	67.1833	9.04662	0.134656	1.60356
MTCONS_00003631	54.22	59.22	61.39	42.27	70.37	50.32	44.66	61.17	58.55	37.09	60.06	57.02	54.695	9.06626	0.16576	1.89728
MTCONS_00082965	87.92	91.75	78.62	70.73	76.94	75.86	71.04	81.97	91.72	60.82	74.5	68.58	77.5375	9.09406	0.117286	1.50855
MTCONS_00016762	52.81	56.34	67.09	47.16	72.37	60.55	48.87	72.34	57.41	43.6	64.07	53.51	58.01	9.11285	0.157091	1.65986
MTCONS_00005115	56.72	53.7	38.24	39.32	45.51	59.23	40.24	50.16	58.91	43.35	66.16	60.67	51.0175	9.11969	0.178756	1.73013
MTCONS_00021564	82.56	80.85	93.06	69.16	71.87	90.56	68.59	79.18	81.11	62.04	86.03	86.46	79.2892	9.12706	0.115111	1.5
Maker00023047.1	89.08	91.59	93.13	94.29	102.24	87.79	93.28	72.58	93.2	82.98	96.4	69.56	88.8433	9.14108	0.10289	1.46981
MTCONS_00028330	63.29	52.87	56.9	48.27	84.99	71.36	63.12	65.94	59.26	54.59	64.77	58.82	62.015	9.18636	0.148131	1.76072
MTCONS_00033075	65.07	66.35	58.62	41.29	63.72	63.56	45.64	66.88	62.64	40.69	57.62	59.33	57.6175	9.20097	0.159691	1.64365
Maker00075830.1	53.51	55.53	54.75	42.72	64.28	40.59	44.05	66.63	54.85	37.04	46.49	40.34	50.065	9.21935	0.184148	1.79887
MTCONS_00038332	62.32	68.04	55.33	46.54	57.54	69.22	45.1	61.33	67.14	42.64	63.78	47.23	57.1842	9.23042	0.161416	1.62336
MTCONS_00071240	58.64	54.41	54.24	47.47	50.07	66.65	46.27	61.5	59.01	55.13	57.05	82.26	57.725	9.2361	0.160002	1.77783
MTCONS_00012088	221.29	221	229.06	226.78	251.58	237.99	236.66	227.9	231.37	225.76	223.13	214.98	228.958	9.24684	0.0403866	1.17025
MTCONS_00072347	73.36	69.25	63.65	46.89	59.33	66.36	49.11	64.74	67.4	41.52	61.49	61.03	60.3442	9.26164	0.15348	1.76686
MTCONS_00058086	86.4	87.24	67.14	67.38	73.64	77.83	73.68	73.95	96.94	63.68	80.62	82.99	77.6242	9.28538	0.11962	1.5223
Maker00077231.1	84.25	79.61	97.08	77.42	88.92	98.15	84.29	69.44	90.42	68.9	93.34	88.83	85.0542	9.29462	0.109279	1.42453
MTCONS_00039359	76.87	76.35	80.85	66.4	85.01	53.83	75.18	62.98	74.68	58.09	68.05	60.4	69.8908	9.31242	0.133242	1.57923
Maker00015260.1	59.55	60.61	70.21	45.84	65.64	44.27	49.18	57.13	59.44	37.77	50.53	45.47	53.8033	9.32908	0.173392	1.85888
Maker00078493.1	99.2	102.55	86.99	98.49	91.14	79.42	94.54	90.08	114.52	88.23	84.39	83.24	92.7325	9.35	0.100828	1.44195
MTCONS_00060510	78.47	72.66	56.54	63.19	66.07	64.71	79.9	46.27	72.73	55.43	67.87	62.6	65.5367	9.35813	0.142792	1.72682
Maker00070552.1	61.69	57.72	61.34	45.76	53.11	68.5	46.73	49.91	66.04	34.7	63.07	55.97	55.3783	9.38159	0.169409	1.97406
MTCONS_00011215	82.58	84.27	84.75	67.23	81.81	88.35	70.58	72.33	85.59	62.2	87.43	62.75	77.4892	9.38213	0.121077	1.42042
MTCONS_00060004	72.36	82.1	76.1	86.46	70.85	79.92	86.58	52.76	81.25	78.95	71.16	63.71	75.1833	9.38321	0.124804	1.64102
MTCONS_00058365	52.86	51.12	54.34	40.44	52.01	70.99	39.32	51.9	53.9	41.02	63.96	63.78	52.97	9.38405	0.177158	1.80544
Maker00023177.1	96.01	89.07	97.65	90.08	95.53	111.72	79.49	112.18	87.56	101.51	98.89	106.38	97.1725	9.43707	0.0971166	1.41125
MTCONS_00045994	84.22	93.22	76.13	68.39	90.38	80.87	73.55	77.35	90.2	58.6	80.67	83.71	79.7742	9.46517	0.11865	1.59078
MTCONS_00050305	50.08	47.85	54.13	50.92	42.24	66.87	51.09	48.65	49.92	47.7	58.51	78.53	53.8742	9.49528	0.176249	1.85914
Maker00069890.1	62.87	59.24	74.49	63.86	94.58	74.23	68.58	58.85	66.81	60.11	72.38	72.64	69.0533	9.49891	0.137559	1.60714
Maker00063483.1	67.74	64.59	53.39	67.24	70.16	46.5	74.52	62.24	69.47	59.52	55.01	42.57	61.0792	9.50022	0.155539	1.75053
MTCONS_00028680	83.87	91.01	64.31	69.63	62.32	79.7	71.2	61.45	85.3	63.33	75.15	69.4	73.0558	9.51897	0.130297	1.48104
Maker00061389.1	61.82	62.17	68.94	47.19	70.46	70.38	52.31	61.73	60.69	42.45	71.23	72.74	61.8425	9.51966	0.153934	1.71355
MTCONS_00083261	44.51	53.22	56.53	49.11	60.69	75.66	47.11	57.55	46.56	46.37	71.22	57.75	55.5233	9.53626	0.171752	1.69984
Maker00005895.1	112.02	113.21	121.5	97.19	105.8	111.92	96.68	101.97	118.35	86.77	111.96	106	106.948	9.53653	0.0891702	1.40025
MTCONS_00046549	68.01	73.73	48.91	55.36	50.82	47.69	57.74	53.82	75.07	52.19	48.56	48.75	56.7208	9.54289	0.168243	1.57412
MTCONS_00039371	76.26	72.83	56.03	79.33	64.5	65.02	80.44	65.05	79.32	91.34	62.37	66.47	71.58	9.57833	0.133813	1.6302
Maker00023171.1	60.5	58.42	62.71	32.57	59.22	52.49	46.26	58.01	54.64	32.97	51.35	54.11	51.9375	9.57893	0.184432	1.92539
Maker00040221.1	110.43	103.3	91.78	98.4	102.13	97.37	96.93	117.51	120.69	86.06	99.01	106.37	102.498	9.60182	0.0936778	1.40239
MTCONS_00051183	71.35	72.13	78.83	61.6	73.43	88.45	61.82	82.58	74.88	58.71	82.62	87.56	74.4967	9.61111	0.129014	1.50656
MTCONS_00013024	58.5	56.17	54.58	44.37	48.29	62.14	43.25	51.5	54.92	39.39	55.69	77.85	53.8875	9.68045	0.179642	1.97639
MTCONS_00065105	55.48	56.83	63.82	53.63	56.03	70.32	51.93	71.6	52.26	51.26	59.19	84.23	60.5483	9.6955	0.160128	1.64319
Maker00020412.1	62.93	60.22	57.89	72.38	65.12	53.73	79.18	49.89	57.42	72.41	57.33	43.5	61	9.70397	0.159082	1.82023
MTCONS_00067016	88.24	92.92	78.18	83.88	61.7	87.09	73.87	72.91	97.65	84.79	71.99	86.39	81.6342	9.71943	0.119061	1.58266
MTCONS_00001582	68.26	67.23	55.29	56.94	79.44	49.84	64.56	79.62	72.79	60.26	52.71	54.73	63.4725	9.74164	0.153478	1.59751
MTCONS_00087584	48.8	45.42	60.41	58.01	71.12	57.87	59.08	50.48	44.23	59.55	63.41	78.99	58.1142	9.74799	0.167739	1.78589
MTCONS_00061336	59.57	56.56	50.33	53.51	55.51	76.27	61.98	44.3	69.18	51.8	77.05	54.59	59.2208	9.77722	0.165098	1.73928
MTCONS_00026350	63.43	66.04	67.2	70.45	58.8	97.19	58.54	75.24	63.99	73.5	66.74	66.35	68.9558	9.78796	0.141945	1.66023
MTCONS_00004972	53.94	56.59	53.36	38.23	60.56	64.59	43.15	40.82	60.62	34.23	62.49	51.63	51.6842	9.79136	0.189446	1.88694
Maker00029339.1	53.29	61.57	70.19	52.95	50.91	71.25	50.49	44.38	60.85	47.29	73.06	69.49	58.81	9.79175	0.166498	1.64624
Maker00071925.1	65.31	69.24	57.45	60.84	58.25	76.48	58.83	45.88	82.36	53.49	72.22	67.49	63.9867	9.80321	0.153207	1.79512
MTCONS_00046747	40.99	47.74	64.98	45.26	76.27	65.41	49.87	48.08	54.17	45.89	55.5	52.48	53.8867	9.80581	0.181971	1.8607
MTCONS_00035179	47.71	47.44	63.21	37.16	62.82	53.65	40.01	54.07	45.52	38.93	66.6	61.54	51.555	9.86381	0.191326	1.79225
MTCONS_00012978	132.4	143.3	118.18	129.71	131.11	136.7	125.22	132.35	146.44	116.83	111.62	132.19	129.671	9.92464	0.0765372	1.31195
MTCONS_00060828	77.19	79.42	58.61	74.41	66.54	52.94	71	49.1	78.78	66.32	62.7	56.21	66.1017	9.92538	0.150153	1.61752
MTCONS_00024759	56.97	58.37	75.67	71.97	84.97	59.38	72.5	84.93	59.16	62.81	65.96	56.95	67.47	9.94201	0.147355	1.49201
Maker00006033.1	52.41	54.25	78.66	47.5	74.3	54.95	54.68	60.17	59.42	41.91	58.41	49.47	57.1775	9.99515	0.174809	1.87688
Maker00021561.1	60.03	59.91	60.98	43.97	65.94	54.8	40.42	51.58	67.18	43.31	42.41	69.71	55.02	10.0446	0.182562	1.72464
MTCONS_00051569	74.48	95.22	75.24	96.58	72.29	75.6	90.81	70.52	88.35	85.29	70.42	66.68	80.1233	10.0496	0.125426	1.44841
Maker00069106.1	79.45	74.31	86.48	63.58	78.71	50.29	63.21	62.53	70.31	57.28	67.18	78.14	69.2892	10.0705	0.14534	1.71963
MTCONS_00060003	87.71	87.74	96.58	73.92	91.83	101.71	73.74	88.98	88.88	66.37	92.16	95.98	87.1333	10.0812	0.115698	1.53247
MTCONS_00057493	44.7	49.45	59.86	39.66	57.88	60.99	49.6	34.26	55.28	34.39	67.12	53.11	50.525	10.142	0.200732	1.95914
Maker00054406.1	69.25	76.35	80.79	78.86	79.35	93.56	81.47	57.98	80.43	75.33	95.37	64.58	77.7767	10.1605	0.130637	1.64488
Maker00022609.1	74.77	78.87	57.53	56.39	48.98	72.65	55.97	48.04	74.93	55.04	66.05	62.43	62.6375	10.1679	0.16233	1.64176
Maker00051160.1	66.44	69.55	71.6	50.2	54.45	81.03	49.76	60.91	67.71	56.25	71.69	80.36	64.9958	10.2763	0.158106	1.62842
MTCONS_00020548	95.36	95.26	74.38	89.71	78.94	88.26	89.3	65.34	102.55	82.94	86.81	72.46	85.1092	10.2979	0.120996	1.56948
MTCONS_00012755	109.67	103.56	95.93	127.69	97.02	97.01	121.51	110.57	113.99	106.62	92.2	102.65	106.535	10.3144	0.096817	1.38492
MTCONS_00055306	74.58	74.52	52.78	53.1	53.87	54.95	55.04	51.26	76.42	45.98	51.84	49.24	57.7983	10.3182	0.178521	1.66203
MTCONS_00030222	63.74	60.37	54.17	51.54	44.97	39.69	60.12	39.23	65.96	46.59	40.5	34	50.0733	10.3224	0.206146	1.94
Maker00067878.1	105.94	99	93.75	80.21	80.57	96.46	77.38	83.76	104.54	76.26	81.34	95.72	89.5775	10.3264	0.115279	1.38919
Maker00005055.1	81.1	74.39	76.59	59.4	71.01	83.01	55.73	76.61	74.64	51.75	73.52	85.94	71.9742	10.3689	0.144064	1.66068
MTCONS_00040926	53.49	52.55	69.3	41.41	74.3	63.95	47.59	52.42	58.43	37.97	64.15	59.36	56.2433	10.3987	0.184887	1.95681
Maker00071183.1	88.67	94.19	65.83	80.72	88.79	68.41	100.28	82.6	93.02	91.31	71.06	85.9	84.2317	10.4273	0.123793	1.52332
MTCONS_00034260	45.51	47.36	58.22	44.83	66.34	44.67	44.33	77.37	47.55	44.15	46.5	41.61	50.7033	10.4683	0.206462	1.85941
Maker00071841.1	58.64	52.65	66.16	43.24	66.39	54.81	40.92	68.4	57.95	43.08	53.01	75.31	56.7133	10.4929	0.185016	1.84042
Maker00019229.1	71.86	67.91	61.68	53.08	58.14	52.61	58.11	43.5	78.59	44.14	47.71	65.12	58.5375	10.5536	0.180288	1.80667
MTCONS_00090698	76.86	79.8	98.48	77.9	103.68	98.76	81.14	86.12	91.76	69.07	100.51	90.2	87.8567	10.6026	0.120681	1.50109
MTCONS_00014054	62.01	71.77	59.55	84.02	77.23	73.8	91.02	89.08	82.11	96.62	77.35	75.55	78.3425	10.6077	0.135401	1.6225
MTCONS_00089844	71.07	68.82	75.26	82.61	64.21	92.48	72.34	77.73	62.77	92.13	74.73	95.84	77.4992	10.6088	0.136889	1.52684
Maker00023264.1	68.79	67.96	90.04	82.02	99.43	68.81	90.41	65.44	80.71	76.06	69.59	69.47	77.3942	10.616	0.137168	1.51941
Maker00035073.1	52.99	51.59	70.53	45.15	65.94	68.55	47.16	70.14	50.81	41.85	64.52	71.39	58.385	10.6461	0.182344	1.70585
MTCONS_00009433	73.57	74.89	58.61	78.28	73.74	55.32	79.8	42.83	78.75	68.81	71.83	69.23	68.805	10.6594	0.154922	1.86318
Maker00078344.1	102.69	103.44	90.34	87.24	94.6	88.07	97.51	90.94	118.57	72.68	96.94	88.23	94.2708	10.7246	0.113764	1.6314
MTCONS_00046611	69.25	70	48.38	65.8	49.25	54.97	62.5	41.55	73.89	54.27	52.65	40.62	56.9275	10.7387	0.188638	1.81905
MTCONS_00044112	55.59	56.75	78.75	49.09	76.39	67.92	50.65	67.78	59.45	43.28	68.2	70.76	62.0508	10.7716	0.173593	1.81955
MTCONS_00009097	87.84	86.52	67.34	71.82	60.22	84.58	73.81	66.33	99.99	68.49	75.56	75.89	76.5325	10.7741	0.140778	1.66041
MTCONS_00052292	118.81	119.07	106.27	108.22	103.74	127.76	106.17	105.92	114.02	91.47	109.61	133.42	112.04	10.8824	0.0971294	1.45862
MTCONS_00042789	77.02	72.5	84.25	52.88	69.87	80.4	52.15	76.25	68.44	57.53	66.59	85.35	70.2692	10.8853	0.154908	1.63663
MTCONS_00092358	57.57	60.09	88.52	80.6	86.69	76.2	75.12	85.15	57.29	76.42	82.01	84.4	75.8383	10.9015	0.143747	1.54512
MTCONS_00066647	70.1	70.5	71.52	53.5	53.99	82.14	56.82	55.83	75.3	52.41	73.78	83.1	66.5825	10.9402	0.164311	1.58558
Maker00031444.1	82.77	81.07	66.55	70.37	55.7	85.64	72.09	56.31	85.88	63.19	88.35	75.68	73.6333	10.9836	0.149166	1.58618
MTCONS_00045206	54.65	61.08	43.7	67.34	50.94	55.18	65.72	36.74	67.18	68.48	38.37	46.9	54.69	11.0038	0.201202	1.86391
MTCONS_00084349	44.48	38.6	55.49	52.72	64.31	60.75	59.58	55.91	38.46	43.5	71	71.42	54.685	11.0184	0.201488	1.85699
MTCONS_00043083	63.88	71.67	47.61	45.67	41.11	49.26	43.2	44.33	72.46	42.66	44.18	44	50.8358	11.0472	0.217311	1.76259
Maker00029359.1	81.05	74.21	82.62	59.01	89.48	85.73	67.78	68.14	73.87	58.06	95.29	75.38	75.885	11.0515	0.145635	1.64123
Maker00008247.1	73.92	72.52	56.79	63.33	45.82	64.5	60.3	41.97	77.98	56.23	56.91	45.8	59.6725	11.0521	0.185213	1.85799
MTCONS_00076307	63.14	63.04	74.9	49.21	84.29	56.99	56.18	79.2	69.33	45.27	67.32	63.59	64.3717	11.1093	0.17258	1.86194
MTCONS_00039067	70.47	72.81	66.55	59.6	73.41	92.36	59.49	68.39	75.08	53.55	90.38	77.79	71.6567	11.1517	0.155627	1.72474
Maker00038429.1	80.14	72.36	91.97	78.49	96.94	88.26	72.62	112.92	76.04	83.55	93.38	88.23	86.2417	11.1985	0.12985	1.56053
MTCONS_00040837	87.76	91.84	92.24	77.87	107.49	83.91	79.95	110.77	99.02	72.98	85.18	80.8	89.1508	11.2034	0.125668	1.51781
MTCONS_00093463	48.55	48.87	68.68	41.45	72.61	64.47	47.3	66.84	55.25	40.96	72.53	57.81	57.11	11.2107	0.1963	1.77271
Maker00063670.1	89.82	80.74	109.43	94.87	115.57	100.17	97.69	116.42	91.96	84	106.52	90.86	98.1708	11.2315	0.114408	1.44191
Maker00071875.1	80.55	85.02	86.97	82.87	86.87	86.11	79.75	52.99	87.32	73.87	90.08	59.22	79.3017	11.2367	0.141696	1.69994
Maker00064335.1	75.82	67.85	70.32	83.88	102.64	84.01	94.35	96.71	82.65	103.99	81.64	89.84	86.1417	11.2438	0.130526	1.53265
MTCONS_00032968	56.08	65.9	60.14	79.24	64.93	76.98	84.49	48.38	73.05	84.35	62.13	81.25	69.7433	11.3575	0.162847	1.74638
MTCONS_00028682	69.14	77.35	62.94	63.21	47.85	89.61	55.7	53.7	78.29	56.87	70.3	66.14	65.925	11.3758	0.172557	1.87273
MTCONS_00093452	64.26	60.27	67.25	46.29	80.11	57.84	47.25	78.4	59.03	40.67	61.01	65.25	60.6358	11.4283	0.188474	1.96976
MTCONS_00068586	69.77	67.41	76.92	79.98	84.26	89.82	83.32	59.91	70.74	68.72	89.26	50.53	74.22	11.4316	0.154023	1.77756
MTCONS_00079330	57.96	50.35	80.17	71.93	68.38	47.78	83.49	56.79	51.79	63.56	62.1	76.51	64.2342	11.4383	0.178071	1.74738
MTCONS_00026440	64.99	72.93	66.74	60.23	46.86	68.55	59.68	59.67	88.79	49.62	65.24	82.24	65.4617	11.4901	0.175524	1.89479
MTCONS_00037157	71.69	71.97	86.28	68.83	97.19	85.08	71.88	100.61	70.37	66.38	94.37	84.63	80.7733	11.5785	0.143346	1.51567
MTCONS_00079228	94.19	98.28	112.53	86.19	109.12	114.35	89.09	92.4	106.79	80.4	108.02	116.59	100.662	11.6005	0.115242	1.45012
MTCONS_00004765	67.07	70.03	73.99	60.7	66.34	79.63	67.88	62.36	74.71	50.04	95.55	86.83	71.2608	11.6102	0.162925	1.90947
MTCONS_00082882	73.19	78.06	64.95	73.54	61.33	102.52	73.71	61.96	87.25	75.23	91.06	80.94	76.9783	11.6478	0.151313	1.67161
Maker00057761.1	79.59	78.29	97.49	67.68	86.43	88.09	80.78	54.34	81.71	62.97	88.12	86.97	79.3717	11.6524	0.146808	1.79407
MTCONS_00074188	61.8	63.88	71.64	53.85	76.5	74.04	50.62	90.94	66.39	47.12	70.97	73.03	66.7317	11.7591	0.176214	1.92997
MTCONS_00038241	74.6	65.95	61.48	45.48	82.29	82.69	55.64	55.75	77.51	54.22	73.57	74.84	67.0017	11.7843	0.175881	1.81816
Maker00025022.1	49.68	41.36	71.6	43.06	67.2	51.18	46.22	75.42	46.68	38.69	47.35	59.75	53.1825	11.7851	0.221597	1.94934
MTCONS_00014153	70.17	75.59	98.38	80.65	74.09	58.07	84.24	75.17	79.98	72.32	54.21	59.04	73.4925	11.7854	0.160362	1.81479
MTCONS_00055721	53.36	56.96	77.91	61.07	83.5	71	59.29	92.1	65.32	56.04	77.09	77.06	69.225	11.8508	0.171192	1.72601
MTCONS_00065284	77.11	81.77	78.11	53.76	85.75	69.07	56.51	83.66	79.58	48.29	75.56	73.36	71.8775	11.8992	0.165549	1.77573
Maker00014536.1	62.9	58.91	91.75	59.06	81.01	82.55	63.38	67.2	60.17	48.5	70.23	78.15	68.6508	11.9025	0.173378	1.89175
Maker00072079.1	73.17	71.76	78.93	51.41	63.83	89.9	53.36	65.23	72.79	47.48	77.31	72.03	68.1	11.9072	0.174849	1.89343
MTCONS_00061008	111.22	110.37	117.11	101.86	110.18	140.77	111.87	114.54	117.09	95.78	125.6	132.81	115.767	11.9249	0.103008	1.46972
MTCONS_00033272	93.39	88.16	118.79	94.77	122.58	116.76	103.08	107.4	99.33	84.81	114.53	99.33	103.578	11.932	0.115199	1.44535
MTCONS_00035978	42.37	40.33	69.89	46.9	71.92	58.73	46.57	67	38.33	42.59	52.62	66.03	53.6067	11.9486	0.222895	1.87634
Maker00068118.1	85.58	89.11	77	65.56	74.08	69.11	68.43	96.78	94.65	56.55	69.75	69.99	76.3825	11.9494	0.156442	1.71141
Maker00035627.1	70.15	75.09	105.08	80.51	102.32	77.72	78.87	83.59	78.91	63.92	73.74	67.7	79.8	11.9642	0.149927	1.64393
MTCONS_00043390	71.67	72.39	95.58	58.99	78.15	87.19	57.24	83.72	75.72	54.69	79.43	82.06	74.7358	12.0048	0.16063	1.74767
Maker00047223.1	96.9	97.72	82.12	92.35	106.57	60.53	95.92	96.72	93.24	82.77	87.65	73.19	88.8067	12.0134	0.135276	1.76061
MTCONS_00033520	50.41	47.64	68.32	67.16	79.62	83.66	69.82	69.35	50.34	63.4	72.09	84.8	67.2175	12.0236	0.178876	1.78002
Maker00055680.1	74.15	83.79	87.22	83.86	113.74	86.98	76.89	107.69	94.09	74.65	81.29	97.04	88.4492	12.0473	0.136206	1.53392
MTCONS_00071623	61.39	61.95	54.55	45.83	63.85	81.8	48.05	56.2	71.07	42.43	81.11	60.82	60.7542	12.0908	0.199012	1.92788
MTCONS_00021006	66.94	70.72	102.63	70.86	94.31	95.8	69.15	84.47	67.25	71.31	85.87	87.96	80.6058	12.1654	0.150924	1.53316
Maker00008239.1	88.96	85.94	106.55	96.42	114.57	74.8	106.88	80.62	82.43	81.85	95.3	79.5	91.1517	12.2014	0.133858	1.53168
Maker00040376.1	110.01	110.98	100.36	94.7	92.53	87.56	98.29	79.36	112.7	79.11	93.44	74.99	94.5025	12.2202	0.129311	1.50287
MTCONS_00068692	78.77	86.15	109.08	101.69	115.92	113.66	104.06	105.22	95.79	99.83	122.35	89.47	101.832	12.2457	0.120253	1.55326
MTCONS_00094143	66.78	65.53	84.26	57.45	90.19	74.81	62.5	79.82	77.27	51.96	85.7	55.29	70.9633	12.2634	0.172813	1.73576
MTCONS_00029437	104.11	102.75	100.49	76.99	104.91	90.44	85.23	104.12	105.75	65.01	91.27	94.21	93.7733	12.27	0.130847	1.62667
Maker00035104.1	76.66	78.95	58.9	56.11	70.27	88.4	58.5	64.78	83.02	50.62	88.05	72.23	70.5408	12.2852	0.174157	1.74635
MTCONS_00020128	114.78	109.38	102.72	92.08	119.79	133.15	106.68	100.71	118.81	92.08	126.74	106.65	110.297	12.3003	0.11152	1.44603
MTCONS_00024151	68.18	70.66	75.05	46.99	56.56	84.49	46.1	52.22	73.08	45.43	66.53	65.09	62.5317	12.304	0.196764	1.85978
Maker00065389.1	108.31	89.2	72.76	87.21	111.07	96.73	123.5	99.93	102.13	105.88	99.61	98.2	99.5442	12.3045	0.123608	1.69736
Maker00078330.1	76.61	73.53	80.4	59.99	74.48	75.97	54.54	81.25	77.62	57.11	95.71	93.6	75.0675	12.3147	0.164048	1.75486
Maker00064291.1	57.4	57.64	58.01	85.78	56.73	78.33	85.84	50.68	64.87	77.04	74.32	53.02	66.6383	12.3194	0.184869	1.69376
MTCONS_00075072	93.28	98.98	83.28	73.29	70.67	94.2	71.89	65.02	106	77.22	80.38	73.53	82.3117	12.3587	0.150145	1.63027
MTCONS_00002245	73.16	70.46	84.55	51.2	68.45	65.37	49.98	87.32	73.28	48.58	66.18	79.62	68.1792	12.3723	0.181468	1.79745
MTCONS_00090179	86.7	88.27	69.17	65.46	52.39	95.99	69.47	65.56	83.53	58.73	70.45	76.33	73.5042	12.3914	0.168581	1.83222
Maker00034322.1	94.94	115.89	88.17	89.93	62.6	91.48	81.16	79.61	90.43	85.26	97.26	75.78	87.7092	12.4221	0.141628	1.85128
Maker00008509.1	98.55	94.4	97.55	78.96	73.68	85.32	78.24	79.7	107.7	67.75	81.8	105.86	87.4592	12.4286	0.142107	1.58967
MTCONS_00051956	72.43	76.42	95.11	55.48	65.07	89.15	58.54	69.39	78.47	51.46	77.21	75.23	71.9967	12.4438	0.172838	1.84823
MTCONS_00067443	99.84	102.92	121.49	108.46	75.32	100.5	106.67	92.26	114.44	109.79	91.26	119.25	103.517	12.4452	0.120224	1.61298
Maker00010601.1	89	89.41	90.04	63.93	88.66	88.18	66	83.68	93.57	57.28	76.92	97.94	82.0508	12.4541	0.151785	1.70985
MTCONS_00039121	60.88	68.96	64.12	41.34	70.71	66.57	40.14	73.7	65.75	40.65	74.28	70.16	61.4383	12.5034	0.203511	1.85052
MTCONS_00077604	81.97	81.76	107.57	73.28	110.65	87.51	82.14	68.17	90.82	70.22	82.18	83.6	84.9892	12.531	0.147443	1.62315
Maker00015056.1	126.49	109.84	118.02	88.71	104.5	131.23	107.12	130.02	123.26	98.1	117.94	118.89	114.51	12.5666	0.109742	1.47931
Maker00037030.1	76.51	73.98	48.47	71.05	49.69	51.96	68.78	40.43	80.65	61.73	60.38	48.46	61.0075	12.5984	0.206505	1.99481
MTCONS_00087062	69.82	75.94	58.92	76.4	70.4	47.56	80.13	58.65	83.22	66.72	50.5	43.39	65.1375	12.6634	0.19441	1.91795
MTCONS_00029928	96.4	95.94	113.86	111.02	135.56	93.53	116.36	128.86	101.65	102.9	106.37	99.54	108.499	12.6984	0.117037	1.44937
MTCONS_00023242	49.68	44.1	73.48	43.9	73.79	62.69	49.4	78.07	51.01	46.01	62.42	75.86	59.2008	12.7893	0.216032	1.77836
MTCONS_00046731	92.13	91.78	100.29	71.22	88.85	87.76	69.86	76.99	87.03	62.98	94.65	108.95	86.0408	12.8421	0.149255	1.72991
Maker00038434.1	62.34	61.99	81.73	83.89	72.44	92.38	81.24	96.61	64.84	89.13	77.81	102.98	80.615	12.8573	0.15949	1.66124
Maker00031191.1	78.84	84.02	56.84	53.47	67.33	60.59	56.21	68.69	94.42	50.64	71.23	57.71	66.6658	12.9067	0.193603	1.86453
Maker00012784.1	46.43	46.86	67.48	38.8	74.02	59.74	40.69	76.55	49.58	41.19	66.01	62.47	55.8183	12.9112	0.231307	1.97294
Maker00003731.1	61.67	63.34	82.16	53.78	82.94	88.3	65.95	66.45	73.73	59.09	68.8	99.66	72.1558	12.9562	0.179559	1.85311
MTCONS_00055451	68.48	66.97	109.65	70.44	86.71	61.14	72.87	66.33	77.48	60.1	70.83	81.9	74.4083	12.9945	0.174638	1.82446
Maker00035221.1	57.31	63.13	74.4	69.94	61.6	97.47	59.28	73.04	67.2	55.79	90.11	86.16	71.2858	13.0141	0.182562	1.74709
MTCONS_00034516	159.06	155.56	158.84	167.86	160.06	176.56	170.58	128.1	171.69	154.65	174.29	146.65	160.325	13.019	0.081204	1.3783
MTCONS_00026127	111.06	123.42	94.04	84.74	92.21	103.21	90.47	93.14	122.79	80.81	101.06	101.32	99.8558	13.0331	0.130519	1.52729
Maker00005626.1	68.09	73.82	60.77	48.51	51.8	87.25	52.56	49.61	74.59	43.66	75.81	56.4	61.9058	13.1065	0.211716	1.9984
MTCONS_00066777	93.04	96.9	94.84	85.35	92.43	114.69	86.42	93.55	102.25	85.78	124.3	121.75	99.275	13.1115	0.132072	1.45636
MTCONS_00079583	101.94	64.1	67.38	60.72	90.96	79.36	90.87	85.13	67.41	58.63	73.17	71.7	75.9475	13.1143	0.172676	1.7387
MTCONS_00077391	65.07	68.23	73.94	44.24	77.05	77.56	47.37	69.13	74.1	39.14	75.74	71.85	65.285	13.1181	0.200936	1.9816
MTCONS_00043609	61.88	59.72	88.45	53.95	92.56	76.18	59.42	64.71	59.82	48.32	77.5	60.12	66.8858	13.127	0.19626	1.91556
MTCONS_00038593	119.14	127.9	151.91	131.53	150.34	112.39	133.59	120.38	123.55	115.69	110.66	115.44	126.043	13.161	0.104416	1.37276
Maker00077553.1	81.44	75.96	83.45	55.33	69.97	93.47	60.23	63.83	87.9	53.05	77.84	90.63	74.425	13.2498	0.178029	1.76192
Maker00008802.1	63.12	61.83	82.07	45.18	59.33	82.39	49.24	55.82	69.33	47.17	69.82	84.76	64.1717	13.2512	0.206496	1.87605
MTCONS_00067516	96.31	97.85	112.56	99.71	111.07	135.68	108.37	87.71	108.64	98.83	128.44	96.93	106.842	13.3084	0.124562	1.54692
MTCONS_00058389	85.72	85.49	68.09	100.89	84.84	69.53	112.75	108.09	88.48	88.6	77.59	79.1	87.4308	13.3093	0.152226	1.6559
MTCONS_00048294	77.87	78.07	75.91	53.2	85.9	73.93	52.63	88.75	79.46	47.28	84.07	77.71	72.8983	13.3168	0.182677	1.87712
MTCONS_00017099	84.54	87.31	97.75	65.39	89.85	102.72	68.48	100.12	92.27	60.07	91.64	91.29	85.9525	13.3505	0.155324	1.71
MTCONS_00064014	47.8	48.42	58.12	82.1	50.59	62.39	67.64	74.31	48.94	87.53	49.09	68.67	62.1333	13.3918	0.215534	1.83117
Maker00008860.1	62.38	58.21	37.68	69.23	39.62	42.84	67.44	34.72	63.63	66.75	38.89	37.02	51.5342	13.444	0.260875	1.99395
Maker00022754.1	85.09	87.94	56.01	74.1	60.85	87	65.19	56.63	102.05	70.33	75.76	71.55	74.375	13.4471	0.180802	1.822
MTCONS_00089866	87.43	88.46	99.48	68.1	80	102.9	64.47	87.57	89.13	56.34	90.54	75.49	82.4925	13.4499	0.163043	1.82641
MTCONS_00009929	95.47	103.11	111.73	131.57	118.47	106.32	127.67	113.71	122.93	147.85	114.16	110.03	116.918	13.4811	0.115304	1.54865
Maker00055410.1	107.53	93.81	92.54	76.38	79.13	74.15	75.73	60.28	89.17	70.69	71.86	60.14	79.2842	13.498	0.170249	1.78799
Maker00078953.1	75.98	86.85	114	87.38	121.54	106.67	85.52	82.75	85.48	89.28	102.21	83.76	93.4517	13.542	0.14491	1.59963
Maker00031587.1	47.36	44.35	71.27	52.02	80.72	65.68	49.52	85.04	47.3	52.79	68.82	71.84	61.3925	13.5455	0.220638	1.91747
Maker00047264.1	87.71	80.19	51.02	68.44	46.87	64.1	69.82	47.52	83.52	60.57	53.08	54.77	63.9675	13.5665	0.212085	1.87135
MTCONS_00066366	102.24	107.71	99.5	81.96	114.5	84.8	89.59	110.4	108.75	69.07	104.43	83.44	96.3658	13.591	0.141035	1.65774
MTCONS_00089934	79.51	82.55	68.39	82.68	94.9	53.01	87.28	87.62	90.96	76.96	60.47	54.8	76.5942	13.5919	0.177453	1.79023
Maker00021590.1	66.78	63.1	46.98	82.29	46.29	53.4	79.55	50.32	80.3	81.69	52.75	58.57	63.5017	13.5996	0.214161	1.77771
Maker00077664.1	137.46	124.88	105.15	106.06	115.82	96.3	110.01	114.32	140.78	96.54	109.81	107.59	113.727	13.6091	0.119665	1.46189
MTCONS_00024331	59.56	53.33	95.02	69.21	99.45	65.44	78.82	74.63	57.75	69.16	66.73	60.66	70.8133	13.6675	0.193007	1.8648
Maker00020447.1	52.84	63.72	85.12	62.37	72.75	85.54	76.78	64.34	60.4	58.18	89.58	97.52	72.4283	13.6919	0.189041	1.84557
MTCONS_00001458	119.16	116.19	142.41	134.94	126.14	151.9	129.42	103.35	128.05	142.13	142.87	147.15	131.976	13.71	0.103882	1.46976
Maker00076577.1	56.7	51.97	96.05	64.97	82.17	83.3	64.82	73.27	55.46	58.16	69.28	88.57	70.3933	13.7341	0.195105	1.84818
Maker00039385.1	64.39	61.46	94.97	84.1	109.67	78.96	92.48	96.7	77.39	71.97	93.18	93.33	84.8833	13.7867	0.162419	1.78441
MTCONS_00082621	78.24	82.93	93.94	61.41	97.17	95.8	61.24	97.83	82.4	63.96	98.07	76.87	82.4883	13.8171	0.167504	1.6014
MTCONS_00090653	62.13	65.85	79.99	57.18	93.61	68.61	54.93	98.27	66.87	51.32	73.48	70.58	70.235	13.8429	0.197093	1.91485
Maker00042667.1	77.28	86.29	66.25	55.9	58.62	87.45	52.85	64.11	80.61	48	88.86	78.25	70.3725	13.8826	0.197273	1.85125
MTCONS_00072630	134.97	135.59	119.45	113.89	107.48	137.25	123.31	98.19	146.99	114.8	117.58	136.89	123.866	13.8835	0.112085	1.497
Maker00027298.1	71.3	65.67	98.6	59.71	99.5	92.93	69.74	79.74	82.13	55.06	84.22	73.26	77.655	13.8902	0.17887	1.80712
MTCONS_00080391	68.94	78.91	99.27	76.66	117.45	94.59	83.7	86.34	80.59	73.81	94.6	65.83	85.0575	13.9072	0.163504	1.78414
MTCONS_00069089	83.29	86.67	91.36	61.45	99.51	82.3	68.47	104.01	94.72	56.85	87.39	86.81	83.5692	13.918	0.166545	1.82955
MTCONS_00064067	57.43	60.56	71.66	72.57	77.58	106.3	72.81	68.59	61.15	79.13	97.67	81.43	75.5733	13.9246	0.184252	1.85095
MTCONS_00021392	94.61	106.45	80.44	85.66	90.31	87.19	91.01	59.55	107.4	74.83	83.22	64.12	85.3992	13.9431	0.16327	1.80353
MTCONS_00084584	49.16	49.97	81.35	54.4	82.93	70.5	52.12	86.81	55.02	52.72	73.99	77.6	65.5475	13.9528	0.212866	1.76587
MTCONS_00066918	83.96	88.36	107.17	98.26	106.06	93.08	95.71	65.29	85.88	86.43	95.66	58.57	88.7025	13.9708	0.157502	1.82978
Maker00078896.1	111.73	110.4	119.01	104.13	143.81	111.6	115.98	87.14	130.23	102.94	123.19	103.1	113.605	13.9867	0.123117	1.65033
MTCONS_00050548	70.4	69.82	84.67	60.5	75.69	53.55	75.38	68.13	72.08	55.61	90.38	105.08	73.4408	14.0129	0.190806	1.96228
Maker00069547.1	95.07	90.25	112.86	77.12	76.45	107.05	74.63	80.84	89.99	71.57	94.44	112.24	90.2092	14.0302	0.15553	1.57692
Maker00071568.1	102.55	103.64	94.43	72.65	86.2	84.81	77.5	70.05	109.88	61.65	93.16	88	87.0433	14.0471	0.16138	1.78232
MTCONS_00044980	88.82	86.4	100.88	63.7	83	90.92	63.8	98.13	80.48	52.16	86.4	73.93	80.7183	14.1029	0.174718	1.93405
MTCONS_00084521	79.75	72.37	65.71	81.65	92.15	103.35	91.26	72.35	93.89	83.02	119.4	84.44	86.6117	14.1213	0.163041	1.81708
Maker00060318.1	99.62	110.16	79.26	100.3	83.89	91.19	116.36	77.62	113.46	121.56	91.41	90.53	97.9467	14.1367	0.14433	1.56609
MTCONS_00035638	121.9	129.27	98.01	104.98	93.42	125.17	106.94	97.81	139.19	96.14	118.46	113.63	112.077	14.2069	0.126761	1.48994
MTCONS_00072776	91.23	98.15	135.42	88.66	120.28	114.53	91.31	112.39	107.79	86.44	99.74	111.89	104.819	14.2075	0.135543	1.56664
MTCONS_00049889	62.39	63.73	86.24	55.14	81.84	78.78	52.72	94.05	65.29	49.77	79.65	85.57	71.2642	14.2123	0.199431	1.88969
MTCONS_00034594	91.26	92.54	111.9	123.15	109.18	99.08	116.56	79.52	93.9	111.86	98.03	73.82	100.067	14.3046	0.14295	1.66825
MTCONS_00008631	109.63	117.73	93.27	98.58	90.92	93.83	102.43	69.53	115.99	81.21	87.56	77.6	94.8567	14.3092	0.150851	1.69323
MTCONS_00070340	80.24	77.45	80.71	67	61.85	113.51	67.7	64.63	82.32	61.54	89.62	89.24	77.9842	14.4085	0.184761	1.84449
Maker00028441.1	60.27	48.96	63.32	51.7	93.93	73.1	60.35	91.29	54.5	53.52	80.27	70.43	66.8033	14.5499	0.217801	1.9185
Maker00061652.1	100.3	101.13	121.73	89.6	134.04	96.68	94.81	115.4	106.99	78.86	118.34	106.69	105.381	14.5631	0.138195	1.69972
MTCONS_00022177	69.04	75.27	68.69	52.63	58.48	100.19	53.85	55.23	76.51	51.41	88.45	65.81	67.9633	14.5814	0.214548	1.94884
Maker00021411.1	149.87	145.44	134.22	117.47	142.5	133.63	123.67	117.06	146.88	109.72	142.66	158.95	135.173	14.6016	0.108022	1.44869
Maker00069471.1	105.67	87.67	76.85	101.01	73.67	94.89	109.54	57.49	97.76	104.46	90.83	84.05	90.3242	14.6588	0.162291	1.90537
Maker00023355.1	87.59	64.44	50.25	72.34	64.61	92.24	84.89	57.58	98.19	92.14	82.87	85.51	77.7208	14.7513	0.189799	1.95403
MTCONS_00063602	129.67	130.81	128.72	112.92	101.27	142.79	108.74	106.94	142.6	114.11	121.47	147.54	123.965	14.7803	0.11923	1.4569
Maker00056643.1	85.52	59.96	58.96	55.59	78.73	96.79	74.69	67.32	70.77	58.93	102.27	84.31	74.4867	14.7818	0.198448	1.83972
MTCONS_00063346	104.86	87.06	102.39	95.13	140.24	128.47	110.96	119.57	104.12	100.07	128.73	107.52	110.76	14.8969	0.134497	1.61084
Maker00077473.1	60.16	53.64	69.13	46.31	85.3	81.13	54.03	83.09	56.54	47.05	85.92	80.51	66.9008	14.909	0.222852	1.85532
MTCONS_00068025	68.96	73.91	112.97	77.31	111.62	74.61	75.61	70.28	69.57	74.16	75.02	69.16	79.4317	14.9365	0.188042	1.6382
MTCONS_00051310	107.64	115.09	105.66	85.61	122.56	97.57	84.64	127.82	112.22	75.41	106.99	99.51	103.393	15.0412	0.145475	1.695
Maker00020671.1	91.34	87.53	50.33	64.25	62.24	61.7	61.31	50.37	100.11	67.61	63.34	62.7	68.5692	15.1603	0.221096	1.98907
MTCONS_00003682	89.01	90.06	51.68	59.89	49.73	56.22	61.11	53.76	91.52	53.57	54.75	66.72	64.835	15.2791	0.235661	1.84034
Maker00022437.1	163.9	155.81	144.92	151.34	160.79	173.68	147.94	197.36	162.06	155.94	177.26	187.2	164.85	15.3849	0.0933268	1.36185
MTCONS_00041730	53.11	50.7	52.46	86.07	63.17	48.94	75.84	94.72	50.79	83.22	54.99	60.87	64.5733	15.4329	0.238998	1.93543
Maker00009076.1	92.07	111.46	79.83	70.4	84.64	89.85	69.9	79.89	116.21	60.9	88.15	93.7	86.4167	15.5032	0.1794	1.90821
MTCONS_00065042	145.35	145	117.44	134.87	126.75	100.82	120.83	144.63	142.84	136.16	106.36	110.23	127.607	15.5081	0.121531	1.44168
Maker00009475.1	126.66	114.21	152.48	118.52	155.52	110.48	132.86	123.67	121.97	100.07	115.27	117.67	124.115	15.5238	0.125076	1.55411
Maker00020632.1	56.36	56.29	92.69	54.92	79.95	80.51	51.31	60.68	61.26	50.84	67.64	97.59	67.5033	15.5386	0.23019	1.91955
Maker00036930.1	100.58	100.04	89.14	77.12	82.81	124.82	79.52	72.35	95.16	72.73	112.02	99.01	92.1083	15.5522	0.168847	1.72522
Maker00045505.1	92.72	85.49	55.24	48.89	60.58	61.98	56.96	55.91	93.78	47	67.13	59.01	65.3908	15.5719	0.238137	1.99532
MTCONS_00049410	95.77	83.28	111.58	72.77	116.62	98.89	78.34	115.47	89.09	67.32	89.3	100.79	93.2683	15.5919	0.167173	1.73232
MTCONS_00079307	111.62	111.23	86.01	74.06	70.28	96.91	83.19	83.96	116.02	68.21	94.95	81.14	89.7983	15.7109	0.174957	1.70092
MTCONS_00020367	173.38	182.02	203.17	168.51	197.93	172.02	165.43	161.05	165.32	149.59	172.97	149.67	171.755	15.7246	0.0915527	1.35818
Maker00069436.1	96.36	99.24	108.87	67.78	92.66	101.71	68.73	94.43	105.66	59.19	100.55	100.09	91.2725	15.7587	0.172656	1.83933
Maker00008165.1	98.25	91.23	141.27	93.57	121.9	117.19	107.27	92.6	107.01	80.45	119.04	103.35	106.094	15.9861	0.150679	1.756
MTCONS_00045261	75.3	80.42	103.87	71.3	104.05	115.32	69.65	112.24	72.28	82.23	99.01	94.53	90.0167	16.0032	0.177781	1.65571
Maker00010015.1	108.88	116.03	70.5	76.3	69.85	94.12	79.69	79.19	114.41	74	85.19	85.34	87.7917	16.0372	0.182673	1.66113
Maker00043936.1	95.75	98.72	92.61	60.91	72.82	94.82	60.33	60.4	89.94	52.79	86.3	69.23	77.885	16.0867	0.206544	1.87005
MTCONS_00046006	95.35	98.28	106.72	66.26	77.62	111.21	70.03	78	103.22	62.23	100.96	87.46	88.1117	16.1141	0.182883	1.78708
Maker00069909.1	90.65	87.13	112.66	67.47	105.96	92.31	73.27	106.45	93.24	59.22	97.11	107.16	91.0525	16.1501	0.177372	1.9024
Maker00005500.1	282.44	269.5	288.16	281.03	278.32	292.04	279.88	269.71	269.94	240.05	297.71	247.78	274.713	16.2047	0.0589878	1.2402
MTCONS_00050477	144.18	153.71	175.88	155.26	168.37	153.97	160.44	137.4	153.9	147.53	148.56	107.41	150.551	16.3292	0.108463	1.63746
Maker00020389.1	74.88	77.41	99.54	92.62	136.68	76.23	91.02	99.07	83.88	82.49	96.69	78.41	90.7433	16.3382	0.180049	1.82532
Maker00072486.1	101.83	102.77	72.67	79.71	79.58	74.14	65.75	109.32	119.76	78.74	88.35	73.89	87.2092	16.3603	0.187598	1.82144
Maker00040309.1	96.74	100.38	112.22	83.23	81.96	127.25	74.65	82.94	110.53	70.19	105.3	90.75	94.6783	16.3715	0.172918	1.81294
MTCONS_00066672	97.84	88.84	96.33	79.47	116.64	85.97	82.8	138.39	101.56	77.23	99.77	94.03	96.5725	16.3889	0.169706	1.79192
MTCONS_00063063	55.13	56.32	62.92	96.62	53.49	66.6	77.27	52.32	58.44	102.18	59.64	52.25	66.0983	16.3948	0.248037	1.9556
MTCONS_00082579	102	101.12	95.81	62.68	93.01	85.14	65.66	109.01	106.99	58.62	85.41	86.44	87.6575	16.5216	0.188479	1.8596
MTCONS_00015424	94.13	105.7	80.45	70.24	97.84	106.85	74.69	71.37	121.24	77.46	112.08	85.32	91.4475	16.5568	0.181053	1.72608
MTCONS_00028013	92.82	84.42	120.26	96.37	132.46	114.69	98.62	134.27	87.95	103.84	118.09	125.8	109.132	16.6226	0.152316	1.5905
MTCONS_00089224	87.47	82.43	114.02	66.94	83.28	114.77	75.13	70.23	77.1	61.18	100.82	77.14	84.2092	16.6337	0.197528	1.87594
MTCONS_00094052	121.97	106.2	135.07	150.43	121.64	95.31	135.62	114.19	102.12	140.24	115.72	142.54	123.421	16.7151	0.135432	1.57832
Maker00043661.1	109.45	121.43	82.26	83.76	82.6	96.59	95.66	67.62	113.9	63.21	92.49	90.13	91.5917	16.7352	0.182716	1.92106
Maker00059190.1	185.81	171.15	154.75	137.48	128.81	166.1	152.56	147.41	168.73	130.71	146.19	139.98	152.473	16.8199	0.110314	1.44251
MTCONS_00028305	103.97	113.47	88.61	68.53	81.42	88.26	71.55	69.06	110.88	58.54	78.26	76.03	84.0483	16.8277	0.200214	1.93833
Maker00021491.1	123.73	122.41	130.15	107.67	131.17	162.12	108.26	131.53	124.23	109.3	142.89	156.01	129.123	16.8296	0.130338	1.50571
Maker00061022.1	120.17	109.35	102.48	68.11	112.09	99.88	79.56	104.21	105.22	65.32	97.4	81.9	95.4742	16.876	0.17676	1.83971
Maker00070874.1	78.05	68.54	112.12	102.61	115.92	97.1	107.18	123.76	91.05	108.09	101.07	71.49	98.0817	16.8783	0.172085	1.80566
MTCONS_00065352	96.96	94.84	67.1	65.49	52.48	65.13	68.81	53.65	100.91	55.93	71.44	52.7	70.4533	16.8926	0.23977	1.92283
Maker00047338.1	169.01	164.38	178.35	135.95	160.18	180.39	148.21	131.02	166.72	129.64	170.37	162.5	158.06	16.9451	0.107207	1.39147
Maker00013967.1	202.74	214.52	214.32	183.46	215.35	216.52	185.43	181.07	205.47	160.52	209.4	195.7	198.708	16.9596	0.0853494	1.34887
MTCONS_00044589	126.27	119.23	120.37	86.25	112.51	122.09	86.91	105.91	134.53	78.36	120.75	105.86	109.92	16.9786	0.154463	1.71682
Maker00036554.1	120.63	107.65	83.22	100.65	89.17	88.33	106.6	62.51	107.81	86	85.39	63.54	91.7917	16.9802	0.184986	1.92977
MTCONS_00092408	142.61	123.26	157.36	124.28	140.6	164.76	134.6	113.9	139.81	109.33	159.11	148.89	138.209	17.0922	0.123669	1.507
Maker00020487.1	93.79	97.7	58.4	91.29	49.62	76.76	89.59	49.22	89.74	89.18	65.35	65.88	76.3767	17.0926	0.223794	1.98497
MTCONS_00057664	99.05	104.06	85.12	130.41	98.93	93.25	125.02	71.46	109.54	126.35	93.31	90.61	102.259	17.0973	0.167196	1.82494
MTCONS_00080122	119.84	120.13	92.4	116.7	77.51	91.23	118.01	76.49	125.99	105.29	90.89	86.99	101.789	17.1089	0.168082	1.64714
MTCONS_00064661	119.39	123.08	122.36	140.4	122.15	104.88	145.96	86.63	141.28	123.68	108.93	97.71	119.704	17.1683	0.143423	1.68487
MTCONS_00037132	86.41	94.8	59.37	94.63	58.48	63.22	90.93	53.31	95.48	96.02	57.69	64.14	76.2067	17.1977	0.225672	1.80116
Maker00039342.1	96.53	103.15	82.82	93.41	76.47	133.29	83.54	69.76	91.75	84.7	121.08	92.45	94.0792	17.298	0.183867	1.91069
MTCONS_00059464	84.33	84.39	127.88	91.74	127.55	114.8	93.25	112.12	86.6	75.06	117.56	104.74	101.668	17.3307	0.170463	1.7037
MTCONS_00056013	114.25	131.57	114.94	84.34	102.99	127.88	94.12	130.1	129.14	83.32	121.84	129.57	113.672	17.3943	0.153022	1.57909
MTCONS_00056473	82.96	82.83	93.47	62.97	109.77	98.54	64.13	109.96	85.05	55.83	103.76	95.1	87.0308	17.5041	0.201125	1.96955
Maker00071853.1	93.24	96.41	74.1	61.24	62.38	102.25	61.71	73.75	106.17	55.3	93.06	95.27	81.24	17.5373	0.215871	1.91989
MTCONS_00079727	85.02	80.42	128.76	92.97	139.39	115.36	100.73	102.5	98.91	85.6	120.82	106.53	104.751	17.5415	0.167459	1.73328
MTCONS_00024141	85.63	77.67	119.53	110.4	97.33	135.99	119.15	97.23	83.13	112.56	124.57	120.94	107.011	17.7158	0.165552	1.75087
MTCONS_00019255	85.98	87.97	105.27	69.65	113.18	90.47	72.7	131.74	95.97	71.72	96.09	107.87	94.0508	17.7387	0.188608	1.89146
MTCONS_00033767	87.32	90.08	133.92	73.86	112.02	99.98	75.24	102.26	87.51	73.74	94.76	118.07	95.73	17.8803	0.186779	1.81611
Maker00063492.1	125.21	124.78	150.59	104.64	123.5	152.7	106.33	133.04	129.39	93.3	141.12	144.29	127.407	17.8857	0.140382	1.63666
Maker00077773.1	105.89	99.76	111.15	62.65	86.6	103.8	66.52	104.28	107.9	62.46	91.18	109.11	92.6083	17.9447	0.193769	1.77954
Maker00021383.1	110.86	111.55	86.33	68.36	112.39	87.52	70.51	107.39	113.02	60.81	95.39	85.69	92.485	18.089	0.195588	1.85858
Maker00005619.1	98.57	85.97	106.33	84.26	107.59	121.99	90.98	123.12	112.29	86.97	116.51	147.44	106.835	18.0903	0.16933	1.74982
MTCONS_00030302	94.36	101.13	144.74	138.19	126.35	131.9	145.25	95.91	121.84	133.74	142.49	110.71	123.884	18.1647	0.146627	1.53932
Maker00010312.1	92.71	86.43	80.01	128.66	91.73	121.36	129.03	108.26	96.18	129.18	97.17	130.21	107.578	18.2382	0.169536	1.62742
Maker00016674.1	117.19	102.71	113.84	74.61	128.33	91.13	84.45	112.59	98.83	65.85	104.74	120.16	101.203	18.2568	0.180399	1.94882
MTCONS_00066079	105.84	101.25	119	82.18	139.06	119.16	90.48	102.98	110.27	73.14	124.64	88.13	104.677	18.3006	0.174828	1.90129
Maker00077604.1	127.83	138.04	115.65	94.76	115.75	100.91	99.42	100.95	135.48	81.44	113.33	80	108.63	18.3288	0.168727	1.7255
MTCONS_00016041	121.46	107.51	128.6	151	133.65	122.58	148.67	82.39	131.54	142.77	122.73	110.56	125.288	18.3375	0.146362	1.83275
Maker00011494.1	187.82	195.74	176.03	186.93	203.87	158.15	194.11	158.79	213.61	167.46	189.74	153.51	182.147	18.4775	0.101443	1.39151
MTCONS_00080657	103.35	112.03	141.4	103.29	159.57	127.24	112.8	129.86	123.85	99.22	147.9	138.04	124.879	18.5067	0.148197	1.60824
MTCONS_00086360	88.56	80.06	85.94	73.33	124.91	115.36	88.2	119.76	95.38	82.7	117.37	126.39	99.83	18.5787	0.186103	1.72358
MTCONS_00093383	165.89	169.68	148.43	132.95	158.49	154.69	130.57	178.87	181.11	120.33	160.14	169.68	155.903	18.615	0.119402	1.50511
MTCONS_00080674	117.24	105.27	113.34	78.48	147.19	141.66	102.51	113.84	123.74	99.39	137.66	120.03	116.696	18.6297	0.159643	1.87551
Maker00008331.1	106.4	105.81	107.33	73.47	111.85	117.23	67.19	108.14	98.82	65.32	122.35	109.93	99.4867	18.7337	0.188303	1.87309
Maker00025428.1	61.23	64.16	118.57	72.62	115.64	82.43	85.85	83.96	62.05	62.56	93.37	82.5	82.0783	18.7769	0.228768	1.93647
Maker00068141.1	115.54	123.89	104.45	108.55	83.17	112.56	115.66	77.89	117.9	94.57	151.91	97.46	108.629	18.792	0.172992	1.95031
MTCONS_00028355	100.29	97.02	117.94	64.26	103.44	112.33	69.46	120.15	103.1	64.44	104.24	99.17	96.32	18.7994	0.195177	1.86975
Maker00068097.1	136.3	131.2	146.24	115.58	170.67	129.83	127.43	155.94	128.71	100.48	162.45	137.5	136.861	18.85	0.137731	1.69855
MTCONS_00035237	116.34	118.26	158.55	114.88	169.76	139.07	121.24	99.66	128.46	115.55	137.08	135.99	129.57	18.9813	0.146495	1.70339
Maker00038217.1	70.7	74.21	113.2	81.06	129.37	98.13	84.44	117.04	92.65	72.69	117.36	98.69	95.795	19.0305	0.198658	1.82984
Maker00016441.1	134.79	124.14	120.51	109.77	118.39	103.77	120.08	89.83	128.36	93.52	161.26	139.37	120.316	19.0711	0.158509	1.79517
Maker00072047.1	123.67	136.13	82.58	84.45	84.64	106.91	91.54	80.81	127.71	84.26	94.88	115.07	101.054	19.1267	0.189272	1.68457
MTCONS_00034433	114.53	115.9	137.61	109.78	160.17	97.81	124.04	123.03	124.59	94.71	105.57	85.02	116.063	19.3635	0.166835	1.88391
MTCONS_00010873	72.57	71.23	108.12	99.95	110.21	131.97	93.63	104.91	68.6	104.63	121.39	117.36	100.381	19.5824	0.195081	1.92376
Maker00000403.1	247.52	215.99	230.84	256.05	284.72	233.19	262.82	244.49	256.02	258.75	211.92	247.84	245.846	19.5997	0.0797235	1.34353
MTCONS_00061211	107.75	117.35	81.13	70.03	83.76	108.78	66.01	122.72	108.89	69.21	110.04	106.96	96.0525	19.6151	0.204212	1.85911
MTCONS_00072601	126.29	127.73	156.32	139.31	161.61	131.51	133.95	92.99	136.21	119.2	130.67	93.28	129.089	19.7467	0.15297	1.73793
MTCONS_00048725	102.27	105.65	108.1	92.74	136.94	93.11	98.4	156.59	115.72	82.41	127.37	110.68	110.832	19.9671	0.180157	1.90013
Maker00039774.1	125.04	114.55	102.97	116.64	86.75	83.52	125.99	71.2	116.07	110.12	80.79	68.35	100.166	20.0158	0.199826	1.84331
MTCONS_00073102	126.28	118.81	153.27	111.07	177.55	134.09	132.12	156.89	127.59	103.34	142.07	121.37	133.704	20.0339	0.149837	1.71811
Maker00025147.1	139.98	139.19	105.36	127.46	90.32	94.99	111.88	90.9	122.76	105.33	88.71	75.05	107.661	20.1079	0.186771	1.86516
MTCONS_00051963	213.04	203.64	182.06	174.43	172.18	185.36	182.76	135.5	209.23	168.56	170.73	192.67	182.513	20.2473	0.110936	1.57225
Maker00054115.1	118.75	99.89	116.79	69.38	131.63	104.9	78.53	131.6	104.46	68.76	103.44	103.28	102.618	20.3946	0.198743	1.91434
Maker00011329.1	130.67	130.78	89.39	132.49	101.09	78.53	144.24	90.36	132.49	116.99	116.29	98.71	113.502	20.396	0.179697	1.83675
Maker00069627.1	87.41	73.07	137.5	83.96	125.39	120.06	82.51	103.6	82.34	74.89	112.2	104.92	98.9875	20.4457	0.206548	1.88176
MTCONS_00016037	119.56	127.2	116.18	76.09	127.24	112.85	84.45	126.09	130.71	70.98	129.94	110.12	110.951	20.6772	0.186364	1.8415
MTCONS_00092080	134.44	129.49	132.16	100.96	109.33	78.56	99.83	92.16	142.5	90.41	97.54	135.18	111.88	20.7112	0.18512	1.8139
MTCONS_00021111	141.22	170.94	117.5	109.65	118.36	127.51	120.78	116.09	167.54	98.85	124.73	125.3	128.206	20.7833	0.162109	1.72929
MTCONS_00042181	132.79	141.24	167.6	133.03	194.62	156.94	140.92	119.68	146.91	116	154.73	132.04	144.708	20.7886	0.143658	1.67776
Maker00071255.1	125.67	131.83	131.05	92.07	130.72	158.45	103.14	120.8	120.95	89.03	147.31	149.06	125.007	20.8208	0.166558	1.77974
Maker00077841.1	131.42	124.78	133.1	130.71	147.91	76.97	125.44	97.06	124.79	123.61	91.82	150.06	121.472	21.0825	0.173557	1.94959
Maker00022674.1	110.7	101.59	115.62	134.94	140.92	165.39	121.42	131.94	100.43	146.9	144.05	164.2	131.508	21.1337	0.160703	1.64682
Maker00052044.1	158.21	163.86	187.37	125.35	149.14	145.18	130.84	126.14	157.93	107.88	136.63	168.75	146.44	21.2901	0.145385	1.73684
MTCONS_00029354	78.96	82.22	97.3	134.44	88.09	128.25	130.85	87.91	89.25	135.97	123.19	113.95	107.532	21.3133	0.198205	1.72201
MTCONS_00051066	139.21	148.92	110.56	97.01	108.85	103.74	106.54	88.39	152.43	89.26	104.6	95.03	112.045	21.3893	0.1909	1.72452
Maker00077619.1	146.57	144.17	140.86	103.42	151.44	136.73	112.46	117.08	161.15	87.78	151.75	142.44	132.988	21.5114	0.161755	1.83584
Maker00005634.1	142.13	145.82	136.95	122.57	162.4	112.64	140.3	195.54	142.46	112.85	133.29	127.46	139.534	21.6592	0.155225	1.73597
MTCONS_00046127	133.67	146.1	170.71	101.82	159.46	116.55	117.07	119.78	142.75	92.2	132.12	131.36	130.299	21.6818	0.1664	1.85152
MTCONS_00036365	108.21	105.59	129.82	95.45	139.79	151.23	95.1	128.74	118.92	81.91	150.84	134.22	119.985	21.8221	0.181874	1.84629
Maker00057747.1	168.89	182.23	126.32	154.39	115.99	148.74	153.99	110.27	165.62	147.37	140.6	114.07	144.04	22.2341	0.15436	1.65258
Maker00034455.1	266.22	248.65	201.75	254.06	194.17	244.98	245.87	240.08	270.8	230.99	236.17	218.43	237.681	22.4126	0.0942972	1.39465
MTCONS_00031869	134.5	128.22	160.95	114.3	155.06	178.37	120.72	150.04	135.1	106.6	174.04	160.55	143.204	22.4302	0.156631	1.67326
MTCONS_00089233	196.52	207.36	172.73	202.12	138.29	218.78	207.66	167.77	221.45	187.31	187.07	194.13	191.766	22.5127	0.117397	1.60134
Maker00008250.1	167.5	175.41	178.63	140.77	204.61	142.78	155.7	191.01	184.3	129.71	169.25	137.51	164.765	22.5539	0.136885	1.57744
MTCONS_00025969	143.08	158.88	169.59	181.64	185.14	134.37	198.19	120.27	189.5	153.91	157.95	178.64	164.263	22.7569	0.138539	1.64788
Maker00040486.1	109.72	114.97	148.67	82.36	115.93	144.58	82.95	130.46	124.9	77.22	124.68	131.92	115.697	22.8555	0.197547	1.92528
Maker00016132.1	262.07	207.91	257.09	217.57	216.8	241.9	226.4	268.99	234.69	185.61	222.09	235.95	231.423	22.9492	0.099166	1.44922
MTCONS_00025671	120.6	122.31	183.66	126.58	180.5	157.48	133	148.9	133.74	104.38	152.9	153.94	143.166	23.0905	0.161285	1.75953
Maker00058217.1	202.94	201.65	195.9	186.5	170.78	226.75	180.37	142.89	208.28	167.68	214.24	162.38	188.363	23.3326	0.12387	1.58689
Maker00040512.1	134.89	127.1	95.2	72.5	74.35	74.09	79.48	70.83	118.24	67.92	71.08	74.37	88.3375	23.3722	0.264579	1.98601
Maker00022315.1	118.26	127.26	82.41	138.18	75.83	107.38	147.36	79.7	131.39	120.69	102.67	85.79	109.743	23.4887	0.214033	1.94329
MTCONS_00003238	172.45	163.43	123.4	115.17	163.26	142.88	121.2	170.97	165.78	102.49	160.9	132.99	144.577	23.5623	0.162974	1.6826
MTCONS_00039775	143.94	158.33	121.61	101.84	122.13	94.13	97.32	106.79	158.85	102.37	84.61	105.86	116.482	23.9119	0.205285	1.87744
Maker00050948.1	127.9	124.96	124.92	123.63	161.75	91.2	142.65	175.73	143.16	107.3	160.36	106.29	132.488	24.0816	0.181765	1.92686
Maker00039461.1	148.95	142.53	122.94	112.5	147.54	182.18	131.3	156.17	147.11	127.61	189.84	185.93	149.55	24.1699	0.161617	1.68747
MTCONS_00067463	210.68	239.99	233.64	190.77	220.8	176.98	201.59	202.7	226.18	155.87	210.08	174.22	203.625	24.3992	0.119824	1.53968
Maker00068767.1	172.54	193.96	165.66	153.29	163.61	165.12	164.96	126.16	177.27	126.8	171.91	220.57	166.821	24.5787	0.147336	1.74834
Maker00047352.1	171.96	159.04	182.89	158.46	175.19	139.91	168.65	145.76	154.13	137.58	216.28	213.9	168.646	24.6559	0.1462	1.57203
MTCONS_00020459	133.17	110.23	172.79	100.58	116.81	141.63	98.15	168.58	117.26	100.22	121.73	149.27	127.535	24.7074	0.19373	1.76047
MTCONS_00015981	82.31	81.43	146.71	126.19	138.08	143.6	129.03	88.87	91.01	117.43	128.89	151.24	118.733	24.9618	0.210236	1.8573
Maker00044755.1	172.81	196.72	206.87	209.84	206.39	173.85	223.86	146	190.2	205.5	190.25	138.59	188.407	24.9728	0.132547	1.61527
MTCONS_00037359	159.39	163.53	163.87	146.72	150.97	224.69	133.48	162.74	160.67	132.03	196.8	181.17	164.672	25.0077	0.151864	1.70181
MTCONS_00022655	123.54	117.52	170.87	107.78	143.44	170.37	110.54	154.94	120.46	94.41	148.21	162.76	135.403	25.1409	0.185674	1.80987
Maker00030232.1	87.92	89.35	95.43	144.19	104.03	129.9	129.83	171.92	91.11	135.97	109.55	102.91	116.009	25.1704	0.216969	1.95541
MTCONS_00083142	133.33	120.8	111.81	100.56	108.02	151.15	101.42	182.91	141.64	101.1	151.05	151.58	129.614	25.3603	0.19566	1.81891
MTCONS_00091778	156.51	147.79	109.15	96.64	122.92	82.21	106.08	85.12	146.25	85.15	91.93	96.18	110.494	25.4791	0.230593	1.90378
Maker00014390.1	171.41	177.58	93.19	137.34	122.89	116.85	131.32	112.11	157.16	136.72	127.06	96.05	131.64	25.5678	0.194225	1.90557
MTCONS_00037916	138.29	140.74	96.26	159.23	95.92	98.58	150.55	84.68	149.28	151.4	106.9	123.15	124.582	25.5924	0.205426	1.88037
MTCONS_00012515	145.14	129.42	145.49	105.94	162.83	174.06	114.65	161.15	142.42	100.44	137.07	189.94	142.379	25.9893	0.182536	1.89108
Maker00044199.1	165.2	163.96	178.23	122.28	154.29	98.86	146.68	143.7	171.68	95.72	136.65	124.31	141.797	26.0171	0.183482	1.86199
MTCONS_00040112	168.58	157.83	174.91	140.46	221.21	143.5	141.92	203.26	163.57	127.32	173.76	146.88	163.6	26.1189	0.159651	1.73743
Maker00023322.1	154.8	117.41	99.19	96.85	150.42	169.47	144.56	101.11	136.9	115.29	181.22	122.59	132.484	26.9437	0.203373	1.87114
MTCONS_00027305	236.06	238.92	246.17	229.48	299.46	223.77	228.21	269.79	250.04	210	299.22	243.99	247.926	27.0196	0.108982	1.426
MTCONS_00040765	345.78	333.67	358.65	299.75	326.39	329.67	286.86	274.29	361.93	292.49	303.17	323.65	319.692	27.2148	0.0851282	1.31952
MTCONS_00067233	151.09	159.24	175.22	131.16	178.91	192.96	133.08	191.27	179.79	117.89	167.21	213.86	165.973	27.3548	0.164814	1.81406
MTCONS_00069267	277.97	281.44	234.47	206.26	239.19	272.79	221.55	275.83	276.51	201.61	269.19	244.83	250.137	28.1027	0.112349	1.39596
MTCONS_00023177	184.48	177.61	119.31	103	121.51	139.44	100.48	107.93	162.03	99.78	148.11	134.12	133.15	28.5231	0.214218	1.84887
MTCONS_00089613	114.11	115.57	164.81	101.88	196.16	123.1	123.57	169.97	118.16	104.01	157.96	121.28	134.215	28.849	0.214946	1.9254
MTCONS_00049296	259.41	253.89	236.62	191.69	195.14	232.84	203.08	173.25	249.37	172.25	218.34	208.11	216.166	29.0753	0.134505	1.50601
Maker00059120.1	187.55	199.53	230.72	187.25	204.42	209.28	197.32	138.54	202.59	151.91	212.47	132.94	187.877	29.3824	0.156392	1.73552
MTCONS_00064086	194.15	177.16	223.28	136.25	218.92	209.36	158.6	199.88	211.22	134.05	215.97	199.88	189.893	30.0362	0.158174	1.66565
Maker00026583.1	120.14	123.26	151.08	146.59	141.13	191.22	155.91	160.16	123.1	126.17	186.19	222.24	153.933	30.509	0.198197	1.84984
MTCONS_00081346	120.14	124.96	134.17	200.61	151.85	194.42	184.06	136.69	133.27	204.26	186.35	139.46	159.187	30.6704	0.19267	1.70018
Maker00061472.1	245.23	217.56	138.72	163.35	187.51	160.6	207.4	181.78	230.99	174.81	201.93	158.82	189.058	30.8294	0.163068	1.76781
Maker00014009.1	104.41	103.28	158.75	111.12	187.48	122.18	121.22	178.55	119.2	98.78	177.22	135.54	134.811	30.856	0.228884	1.89796
Maker00030687.1	188.7	175.34	160.94	119.67	111.1	146.32	125.72	103.99	193.96	107.82	151.12	111.01	141.308	31.277	0.22134	1.86518
MTCONS_00090437	162.5	174.7	246.13	192.53	220.8	223.59	209.19	141.65	187.87	191.84	206.13	134.63	190.963	31.9544	0.167333	1.8282
MTCONS_00050010	184.4	204.71	217.15	157.3	223.34	255	152.44	224.85	210.64	154.76	235.08	210.59	202.522	31.9616	0.157818	1.67279
MTCONS_00088109	106.05	119.82	139.94	112.79	167.61	203.74	117.51	156.11	132.98	103.2	193.64	154.37	142.313	32.0335	0.225091	1.97422
Maker00012401.1	175.76	187.49	185.41	138.49	207.98	211.95	118.84	218.3	188.69	127.31	201.72	200.58	180.21	32.3832	0.179697	1.83692
Maker00000385.1	104.77	93.53	183.35	96.2	117.09	161.69	99.74	133.05	98.33	101.47	138.59	186.3	126.176	32.833	0.260217	1.99187
Maker00054036.1	180.16	181.86	118.7	101.07	100.95	144.5	104.53	95.32	185.48	96.54	129.87	130.19	130.764	33.2495	0.254271	1.94587
MTCONS_00002097	178.55	179.63	237.15	166.98	268.44	191.68	182.91	243.89	178.45	163.96	212.9	161.12	197.138	33.7395	0.171146	1.66609
Maker00054259.1	236.72	198.92	228.24	203.51	161.45	297.27	192.98	191.61	229.09	176.34	230.56	221.59	214.023	33.755	0.157716	1.84125
MTCONS_00034829	227.65	226.33	209.37	191.33	181.98	262.2	196.54	178.91	256.72	172.37	240.34	280.93	218.722	34.4266	0.157398	1.62981
MTCONS_00047100	274.13	279.29	295.96	313.57	289.62	323.32	291.33	405.4	277.44	310.61	336.84	316.99	309.542	34.5318	0.111558	1.47886
MTCONS_00068478	275.3	297.04	202.09	266.58	279.43	220.61	279.32	281.59	343.31	256.87	285.26	248.03	269.619	34.6323	0.128449	1.6988
Maker00060897.1	314.6	333.78	273.07	266.08	255.79	272.53	252.05	247.51	311.78	228.04	250.56	210.52	268.026	34.7532	0.129664	1.5855
Maker00052359.1	209.5	222.77	158.38	151.85	189.75	206.32	167.31	167.88	246.68	131.59	229.63	151.8	186.122	34.9446	0.187752	1.87461
Maker00016205.1	471.13	457.01	453.28	487.86	448.61	462.8	496.48	399.76	478.2	447.07	475.04	368.23	453.789	35.0415	0.0772197	1.34829
MTCONS_00019045	232.22	273.1	171.24	187.22	191.15	176.45	188.27	171.86	251.67	160.04	192.6	158.36	196.182	35.1365	0.179102	1.72455
MTCONS_00044796	180.21	154.25	168.64	117.11	201.61	202.39	137.15	193.22	158.99	121.69	213.65	232.09	173.417	35.2297	0.203151	1.98181
MTCONS_00084405	210.77	198.83	254.04	246.45	283.45	206.51	301.24	225.07	211.13	213.24	264.95	297.1	242.732	35.4891	0.146207	1.51506
MTCONS_00035366	238.51	252.18	276.34	190.64	252.4	267.42	209.84	255.96	253.76	160.35	271.12	284.41	242.744	35.7786	0.147392	1.77368
MTCONS_00057697	242.5	262.72	257.19	215.65	255.09	311.26	203.95	219.52	278.05	194.08	285.32	307.67	252.75	37.2765	0.147484	1.60377
MTCONS_00016286	231.72	241.9	189.38	299.37	203.02	238.33	292.21	198.52	273.37	294.93	234.81	212.59	242.512	37.4271	0.154331	1.58079
MTCONS_00049394	217.73	211.88	202.27	188.59	309.46	216.14	198.19	293	220.32	182.6	270.82	199.64	225.887	39.9739	0.176964	1.69474
MTCONS_00088541	149.63	165.01	264.46	185.03	273.31	215.16	194.26	232.34	161.23	153.83	198.28	165.3	196.487	40.3292	0.205252	1.82657
MTCONS_00032273	279.76	294.12	183.52	221.99	209.37	201.63	219.32	216.66	311.61	199.98	195.39	207.63	228.415	40.3774	0.176772	1.69796
Maker00035684.1	273.62	263.31	203.86	202.25	174.01	196.05	210.57	176.9	279.62	165.17	192.34	277.4	217.925	41.3629	0.189803	1.69292
MTCONS_00079524	164.44	170.4	204.66	245.7	266.13	232.18	226.95	314.39	173.43	249.1	219.49	176.44	220.276	43.3872	0.196968	1.91188
MTCONS_00016344	276.3	288.37	328.77	215.76	315.48	285.76	231.79	261.55	332.42	188	333.65	261.94	276.649	45.4856	0.164416	1.77473
MTCONS_00085598	220.15	241.83	249.26	172.54	192.83	328.09	179.24	193.85	244.37	164.68	290.06	261.08	228.165	48.1337	0.21096	1.99229
Maker00047133.1	281.8	297.03	301.15	216.58	345.94	266.44	221.72	205.71	336.88	199.4	270.3	222.49	263.787	48.4673	0.183737	1.7349
MTCONS_00092281	291.04	299.26	282.6	294.15	402.15	332.5	261.64	436.46	332.72	304.86	376.99	323.23	328.133	50.0541	0.152542	1.66817
MTCONS_00015995	277.76	273.05	318.39	187.34	271.89	339.24	198.23	251.78	298.78	171.79	313.26	307.9	267.451	52.6211	0.196751	1.97474
Maker00053675.1	497.33	549.74	468.53	492.17	523.12	377.04	533.7	406.26	521.45	411.12	440.31	448.55	472.443	53.6709	0.113603	1.45804
MTCONS_00048161	356.17	354.33	254.19	392.84	262.91	298.86	414.19	266.56	379.82	363.91	256.93	332.63	327.778	55.1324	0.1682	1.62945
Maker00028829.1	208.42	190.42	203.46	191.2	289.07	340.46	214.3	276.08	208.79	214.38	351.76	293.43	248.481	56.0854	0.225713	1.84728
MTCONS_00019376	224.23	219.27	339.78	239.02	292.72	336.28	229.56	398.58	244.22	247.18	306.58	337.31	284.561	56.3359	0.197975	1.81776
MTCONS_00076260	361.69	405.38	279.46	398.38	310.61	300.06	407.56	416.58	415.67	332.85	303.8	252.97	348.751	56.6046	0.162307	1.64676
MTCONS_00007376	335.2	376.62	390.8	237.49	341.84	360.77	251.45	299.27	360.32	204.41	330.45	354.15	320.231	56.8528	0.177537	1.91184
MTCONS_00074198	262.62	282.11	324.61	241.33	406.73	260.64	254.66	401.44	297.59	209.06	342.28	270.59	296.138	59.0204	0.1993	1.94552
MTCONS_00083097	343.43	352.02	188.53	242.82	255.86	200.83	286.97	188.42	344.16	266.96	209.82	210.45	257.522	59.3237	0.230363	1.86827
MTCONS_00049258	297	283.35	335.09	359.56	443.82	252.96	377.23	427.23	276.92	317.66	296.03	261.82	327.389	60.1594	0.183755	1.75451
MTCONS_00020387	294.78	318	464.05	291.14	477.28	319.33	336.33	351.81	306.02	263.42	362.3	326.03	342.541	62.8256	0.183411	1.81186
Maker00051402.1	356.59	430.84	246.6	252.5	307.07	274.74	256.39	254.28	429.22	219.21	319.13	215.44	296.834	71.1398	0.239662	1.99981
MTCONS_00043841	506.15	535.62	306.18	454.34	385.23	348.38	493.48	282.82	555.74	397.73	387.62	307.22	413.376	90.2047	0.218215	1.965
MTCONS_00049514	496.73	520.41	304.22	387.91	316.58	357.76	370.85	309.84	585.92	379.96	324.91	302.8	388.158	90.9524	0.234318	1.93501
MTCONS_00056863	513.86	504.66	449.87	447.27	600.02	350.51	469.72	662.19	546.14	371.56	435.44	363.36	476.217	91.1763	0.19146	1.88922
Maker00030370.1	572.83	543.16	558.97	411.4	476.91	726.35	470.81	681.13	586.42	394.64	620.37	566.4	550.783	95.9352	0.17418	1.84054
MTCONS_00080719	654.63	724.35	494.17	536.02	693.27	460.44	591	722.29	744.23	447.57	708.18	453.13	602.44	113.355	0.18816	1.66282
MTCONS_00043105	402.4	408.33	650.67	411.82	711.06	642.53	442.72	567.03	398.72	373.82	524.49	610.13	511.977	114.829	0.224285	1.90215
MTCONS_00055715	1375.32	1264.22	1275.63	1319.55	1411.43	1114.45	1479.52	1402.92	1396.31	1220.87	1255.9	1070.82	1298.91	118.176	0.0909806	1.38167
Maker00013858.1	922.75	921.9	670.75	802.81	722.19	744.45	887.04	669.5	1034.63	693.33	868.94	576.91	792.933	129.338	0.163113	1.7934
MTCONS_00027860	886.51	894.14	858.49	994.99	955.67	600.04	1001.93	1159.88	856.31	901.06	802.96	718.08	885.838	136.62	0.154227	1.933
MTCONS_00038193	845.39	966.25	738.93	735.08	952.29	644.27	792.4	1007.44	1021.72	616.84	871.45	648.79	820.071	139.648	0.170288	1.65638
MTCONS_00028914	711.71	861.71	747.61	701.66	1041.92	636.28	723.21	1061.87	842.25	571.34	891.25	676.85	788.972	147.175	0.18654	1.85856
MTCONS_00020385	974.99	1058.8	1447.71	976.23	1464.11	960.95	1073.48	1054.61	1059.14	806.11	1207.25	1057.82	1095.1	184.674	0.168637	1.81627
MTCONS_00033738	1660.29	1683.49	1678.81	1358.93	1807.9	1350.96	1459.65	2080.98	1674.68	1194.18	1569.92	1463.06	1581.9	226.791	0.143366	1.7426
Maker00014373.1	1677.38	1789.64	1175.84	1162.31	1379.96	1125.36	1267.63	1456.91	1732.84	941.79	1446.27	1083.56	1353.29	262.825	0.194212	1.90025
Maker00058246.1	1771.78	1719.89	1724.74	1343.76	1858.68	1783.31	1435.41	2014.6	1803.84	1118.43	2101.39	1738.88	1701.23	265.484	0.156055	1.87887
MTCONS_00051648	2866.03	2891.06	2921.9	2313.56	2304.55	2126.14	2449.7	2653.67	2795.98	2001.75	2271.75	1725.18	2443.44	371.225	0.151927	1.69368
