# Supplementary material for: Identification of Reference Genes for Reverse Transcription-Quantitative PCR Analysis of Ginger Under Abiotic Stress and for Postharvest Biology Studies
Source: Front Plant Sci. 2022 Jun 6;13:893495. doi: 10.3389/fpls.2022.893495 (PMC9207462; doi:10.3389/fpls.2022.893495)
Supplement: Supplementary Table 2 — Blast candidate. [file Data_Sheet_2.XLSX]

## Sheet: S2.Blast Candidate
Gene ID	Abbreviation	Annotation	qaccver	saccver	pident	length	mismatch	gapopen	qstart	qend	sstart	send	evalue	bitscore	GeneID	RO2-FPKM	RO3-FPKM	Ye1-FPKM	Gr2-FPKM	Ye3-FPKM	RI1-FPKM	Gr1-FPKM	Ye2-FPKM	RO1-FPKM	Gr3-FPKM	RI3-FPKM	RI2-FPKM	Mean	SD	CV	MFC
AT1G10430.1	PP2A2	cds chromosome:TAIR10:1:3428478:3430636:-1 gene:AT1G10430 gene_biotype:protein_coding transcript_biotype:protein_coding gene_symbol:PP2A2 description:Serine/threonine-protein phosphatase PP2A-2 catalytic subunit [Source:UniProtKB/Swiss-Prot;Acc:Q07098]	AT1G10430.1	MTCONS_00075774	77.766	922	199	6	1	919	417	1335	2.17e-159	562	MTCONS_00075774	8.15	7.76	11.09	5.75	10.67	10.77	6.43	12.03	7.95	5.81	9.22	7	8.5525	#NAME?	#NAME?	2.09217
AT1G50010.1	TUBA4	cds chromosome:TAIR10:1:18517586:18520000:1 gene:AT1G50010 gene_biotype:protein_coding transcript_biotype:protein_coding gene_symbol:TUBA4 description:Tubulin alpha-2 chain [Source:UniProtKB/Swiss-Prot;Acc:B9DGT7]ATGAGAGAGTGCATTTCGATCCACATTGGTCAGGCCGGTATCCAGGTCGGAAATGCTTGC	AT1G50010.1	Maker00037704.1	76.01	1263	283	13	1	1253	277	1529	0	636	Maker00037704.1	1109.85	1052.43	1472.7	631.24	1232.76	2257.33	626.9	1349.27	906.47	577.28	1952.49	2349.82	1293.21	#NAME?	#NAME?	4.0705
AT1G56070.1	LOS1	cds chromosome:TAIR10:1:20967652:20971742:-1 gene:AT1G56070 gene_biotype:protein_coding transcript_biotype:protein_coding gene_symbol:LOS1 description:Elongation factor 2 [Source:UniProtKB/Swiss-Prot;Acc:Q9ASR1]	AT1G56070.1	Maker00053704.1	77.253	2541	552	25	1	2528	1	2528	0	1467	Maker00053704.1	39.05	38.18	34.17	50.77	53.38	27.06	58.54	20.04	44.87	44.45	33.74	15.14	38.2825	#NAME?	#NAME?	3.86658
AT1G78870.1	UBC35	cds chromosome:TAIR10:1:29650423:29652517:1 gene:AT1G78870 gene_biotype:protein_coding transcript_biotype:protein_coding gene_symbol:UBC35 description:UBC35 [Source:UniProtKB/TrEMBL;Acc:A0A178WFI9]	AT1G78870.1	MTCONS_00041075	82.143	364	62	1	1	364	236	596	1.19e-83	309	MTCONS_00041075	39.45	43.83	48.49	28.7	40.62	38.01	30.05	33.3	38.26	27.08	39.76	32.26	36.6508	#NAME?	#NAME?	1.79062
AT2G32170	SAM-Mtase	cds chromosome:TAIR10:2:13666396:13671754:1 gene:AT2G32170 gene_biotype:protein_coding transcript_biotype:protein_coding description:S-adenosyl-L-methionine-dependent methyltransferases superfamily protein [Source:UniProtKB/TrEMBL;Acc:F4IST2]	AT2G32170	MTCONS_00059263	77.043	832	186	4	664	1494	806	1633	1.74e-132	473	MTCONS_00059263	9.7	9.38	9.02	6.89	8.97	10.88	6.97	10.07	9.49	6.03	9	9.48	8.82333	#NAME?	#NAME?	1.80431
AT2G37620.1	ACT1	cds chromosome:TAIR10:2:15778941:15781561:1 gene:AT2G37620 gene_biotype:protein_coding transcript_biotype:protein_coding gene_symbol:ACT1 description:Actin-3 [Source:UniProtKB/Swiss-Prot;Acc:P0CJ47]	AT2G37620.1	Maker00078606.1	81.995	1133	202	2	1	1132	1	1132	0	961	Maker00078606.1	0.79	0.67	0.56	0.35	0.67	0.86	0.24	0.75	0.56	0.26	0.53	1.58	0.651667	#NAME?	#NAME?	6.58333
AT3G18780.2	ACT2	cds chromosome:TAIR10:3:6474710:6477204:1 gene:AT3G18780 gene_biotype:protein_coding transcript_biotype:protein_coding gene_symbol:ACT2 description:Actin-2 [Source:UniProtKB/Swiss-Prot;Acc:Q96292]	AT3G18780.2	Maker00052044.1	82.498	1137	193	5	1	1134	1	1134	0	992	Maker00052044.1	158.21	163.86	187.37	125.35	149.14	145.18	130.84	126.14	157.93	107.88	136.63	168.75	146.44	#NAME?	#NAME?	1.73684
AT3G52590.1	TPL40B	cds chromosome:TAIR10:3:19505379:19506932:1 gene:AT3G52590 gene_biotype:protein_coding transcript_biotype:protein_coding gene_symbol:RPL40B description:Ubiquitin-60S ribosomal protein L40-1 [Source:UniProtKB/Swiss-Prot;Acc:B9DHA6]	AT3G52590.1	MTCONS_00024331	85.492	386	56	0	1	386	77	462	5.64e-112	403	MTCONS_00024331	59.56	53.33	95.02	69.21	99.45	65.44	78.82	74.63	57.75	69.16	66.73	60.66	70.8133	#NAME?	#NAME?	1.8648
AT4G05320	UBC10	cds chromosome:TAIR10:4:2718170:2720133:1 gene:AT4G05320 gene_biotype:protein_coding transcript_biotype:protein_coding gene_symbol:UBQ10 description:Polyubiquitin 10 [Source:UniProtKB/Swiss-Prot;Acc:Q8H159]	AT4G05320	MTCONS_00009409	81.651	218	40	0	229	446	415	632	8.86e-45	182	MTCONS_00009409	15.62	15.63	19.46	15.53	16.47	18.32	16.49	12.68	15.86	13.65	17.22	13.29	15.8517	#NAME?	#NAME?	1.5347
AT4G27960	UBC9	cds chromosome:TAIR10:4:13915531:13917500:-1 gene:AT4G27960 gene_biotype:protein_coding transcript_biotype:protein_coding gene_symbol:UBC9 description:Ubiquitin conjugating enzyme 9 [Source:UniProtKB/TrEMBL;Acc:F4JKF3]	AT4G27960	MTCONS_00021111	81.432	447	83	0	1	447	179	625	8.62e-101	366	MTCONS_00021111	141.22	170.94	117.5	109.65	118.36	127.51	120.78	116.09	167.54	98.85	124.73	125.3	128.206	#NAME?	#NAME?	1.72929
AT5G23860.2	TUBB8	cds chromosome:TAIR10:5:8042876:8044819:1 gene:AT5G23860 gene_biotype:protein_coding transcript_biotype:protein_coding gene_symbol:TUBB8 description:Tubulin beta chain [Source:UniProtKB/TrEMBL;Acc:A0A178UKM5]	AT5G23860.2	MTCONS_00030237	79.234	1305	263	8	1	1301	143	1443	0	902	MTCONS_00030237	102.09	103.9	373.61	59.95	343.84	479.92	68.43	493.41	93.24	52.8	416.96	606.66	266.234	#NAME?	#NAME?	11.4898
AT5G46630	Clathrin	cds chromosome:TAIR10:5:18920334:18923551:1 gene:AT5G46630 gene_biotype:protein_coding transcript_biotype:protein_coding description:Clathrin adaptor complexes medium subunit family protein [Source:UniProtKB/TrEMBL;Acc:F4KHJ7]	AT5G46630	MTCONS_00081884	80.106	1317	254	7	1	1313	274	1586	0	974	MTCONS_00081884	36.12	37.71	42.62	23.63	41.51	34.48	25.8	33.12	40.08	21.3	34.54	33.3	33.6842	#NAME?	#NAME?	2.00094
AT5G60390	EF1alpha	cds chromosome:TAIR10:5:24288596:24291020:1 gene:AT5G60390 gene_biotype:protein_coding transcript_biotype:protein_coding gene_symbol:A1 description:Elongation factor 1-alpha 4 [Source:UniProtKB/Swiss-Prot;Acc:Q8GTY0]	AT5G60390	MTCONS_00049296	82.774	1341	225	6	1	1338	115	1452	0	1192	MTCONS_00049296	259.41	253.89	236.62	191.69	195.14	232.84	203.08	173.25	249.37	172.25	218.34	208.11	216.166	#NAME?	#NAME?	1.50601
