# Supplementary material for: Identification of Reference Genes for Reverse Transcription-Quantitative PCR Analysis of Ginger Under Abiotic Stress and for Postharvest Biology Studies
Source: Front Plant Sci. 2022 Jun 6;13:893495. doi: 10.3389/fpls.2022.893495 (PMC9207462; doi:10.3389/fpls.2022.893495)
Supplement: Supplementary Table 3 — FPKM annotation candidate. [file Data_Sheet_3.XLSX]

## Sheet: S3.FPKM Annotation Candidate
GeneID	RO2-FPKM	RO3-FPKM	Ye1-FPKM	Gr2-FPKM	Ye3-FPKM	RI1-FPKM	Gr1-FPKM	Ye2-FPKM	RO1-FPKM	Gr3-FPKM	RI3-FPKM	RI2-FPKM	Mean	SD	CV	MFC	Abbreviation	GeneID	Nr	Nt	Swissprot	KEGG	KOG	GO
MTCONS_00009943	59.81	60.24	51.06	53.33	59.43	52.69	61.66	57.96	62.15	55.38	55.94	58.5	57.3458	3.4803	0.0606896	1.2172	RBP	MTCONS_00009943	XP_009403821.1/6.4e-100/PREDICTED: RNA-binding protein 8A [Musa acuminata subsp. malaccensis]	XM_009405546.2/6.96896e-172/PREDICTED: Musa acuminata subsp. malaccensis RNA-binding protein 8A (LOC103987285), mRNA	sp|B7FAL5|Y14A_ORYSJ/8.5e-78/RNA-binding protein Y14A OS=Oryza sativa subsp. japonica OX=39947 GN=Y14A PE=1 SV=1	mus:103987285/8.8e-101/RNA-binding protein 8A; K12876 RNA-binding protein 8A	At1g51510/7.0e-59/[R] KOG0130 RNA-binding protein RBM8/Tsunagi (RRM superfamily)	biological_process:GO:0006396//RNA processing;cellular_component:GO:0005634//nucleus;GO:0005737//cytoplasm;molecular_function:GO:0003729//mRNA binding;
Maker00077394.1	60.04	56.2	48.82	56.35	55.08	60.88	58.51	55.56	57.41	62.55	61.15	56.28	57.4025	3.50093	0.0609892	1.28124	26S	Maker00077394.1	OAY67260.1/3.0e-215/26S protease regulatory subunit 6B [Ananas comosus] >OAY72809.1 26S protease regulatory subunit 6B [Ananas comosus]	XM_009405976.2/0/PREDICTED: Musa acuminata subsp. malaccensis 26S protease regulatory subunit 6B homolog (LOC103987625), mRNA	sp|P54778|PRS6B_SOLTU/2.2e-212/26S proteasome regulatory subunit 6B homolog OS=Solanum tuberosum OX=4113 PE=2 SV=1	mus:103987625/7.3e-226/26S protease regulatory subunit 6B homolog; K03063 26S proteasome regulatory subunit T3	At5g58290/2.0e-208/[O] KOG0727 26S proteasome regulatory complex, ATPase RPT3	biological_process:GO:0030163//protein catabolic process;cellular_component:GO:0016020//membrane;GO:0000502//proteasome complex;GO:0009506//plasmodesma;GO:0005737//cytoplasm;GO:0005618//cell wall;GO:0005829//cytosol;molecular_function:GO:0008233//peptidase activity;GO:0005524//ATP binding;GO:0036402//proteasome-activating ATPase activity;
MTCONS_00010202	53.24	52.44	55.22	53.68	59.43	61.59	50.93	51.73	58.13	48.74	58.57	54.43	54.8442	3.69138	0.0673068	1.26364	NCBP	MTCONS_00010202	XP_009396061.1/6.7e-112/PREDICTED: eukaryotic translation initiation factor NCBP-like [Musa acuminata subsp. malaccensis]	XM_009397786.2/0/PREDICTED: Musa acuminata subsp. malaccensis eukaryotic translation initiation factor NCBP-like (LOC103981163), mRNA	sp|A3RCV9|IF4E3_WHEAT/5.8e-97/Eukaryotic translation initiation factor NCBP OS=Triticum aestivum OX=4565 GN=NCBP PE=2 SV=1	mus:103979896/9.2e-113/eukaryotic translation initiation factor NCBP; K03259 translation initiation factor 4E	7290120/2.4e-29/[J] KOG1670 Translation initiation factor 4F, cap-binding subunit (eIF-4E) and related cap-binding proteins	cellular_component:GO:0005737//cytoplasm;molecular_function:GO:0003743//translation initiation factor activity;
Maker00069376.1	76.55	71.63	67.68	72.32	68.16	70.06	78.75	64.62	69.27	69.84	70.25	74.11	71.1033	3.74305	0.0526424	1.21866	MTN	Maker00069376.1	XP_009406331.1/9.3e-259/PREDICTED: probable bifunctional methylthioribulose-1-phosphate dehydratase/enolase-phosphatase E1 1 [Musa acuminata subsp. malaccensis]	XM_009408056.2/0/PREDICTED: Musa acuminata subsp. malaccensis probable bifunctional methylthioribulose-1-phosphate dehydratase/enolase-phosphatase E1 1 (LOC103989253), mRNA	sp|E0CSI1|MTBC1_VITVI/4.7e-236/Probable bifunctional methylthioribulose-1-phosphate dehydratase/enolase-phosphatase E1 1 OS=Vitis vinifera OX=29760 GN=VIT_19s0014g02480 PE=3 SV=2	mus:103989253/1.3e-259/probable bifunctional methylthioribulose-1-phosphate dehydratase/enolase-phosphatase E1 1; K16054 methylthioribulose 1-phosphate dehydratase / enolase-phosphatase E1 [EC:4.2.1.109 3.1.3.77]	At5g53850_1/4.7e-114/[G] KOG2631 Class II aldolase/adducin N-terminal domain protein	biological_process:GO:0019284//L-methionine salvage from S-adenosylmethionine;GO:0019509//L-methionine salvage from methylthioadenosine;cellular_component:GO:0005737//cytoplasm;molecular_function:GO:0000287//magnesium ion binding;GO:0043716//2-hydroxy-3-keto-5-methylthiopentenyl-1-phosphate phosphatase activity;GO:0046570//methylthioribulose 1-phosphate dehydratase activity;GO:0043715//2,3-diketo…
MTCONS_00060008	73.88	76.26	77.2	72.98	64.13	72.71	72.39	70.05	73.31	72.72	70.55	63.26	71.62	4.03185	0.056295	1.22036	CCR	MTCONS_00060008	XP_009414816.1/2.5e-130/PREDICTED: cinnamoyl-CoA reductase 1 [Musa acuminata subsp. malaccensis]	NA	sp|Q9S9N9|CCR1_ARATH/1.6e-65/Cinnamoyl-CoA reductase 1 OS=Arabidopsis thaliana OX=3702 GN=CCR1 PE=1 SV=1	mtr:MTR_4g006940/1.0e-71/cinnamoyl-CoA reductase-like protein; K09753 cinnamoyl-CoA reductase [EC:1.2.1.44]	At2g33590/3.8e-99/[V] KOG1502 Flavonol reductase/cinnamoyl-CoA reductase	molecular_function:GO:0003824//catalytic activity;GO:0050662//coenzyme binding;
MTCONS_00078691	50.62	53.49	56.6	57.34	56.65	52.83	56.86	47.79	58.78	54.3	52.75	43.73	53.4783	4.19765	0.0784926	1.34416	HSP70	MTCONS_00078691	XP_009406395.1/0.0e+00/PREDICTED: stromal 70 kDa heat shock-related protein, chloroplastic-like [Musa acuminata subsp. malaccensis]	XM_009408120.2/0/PREDICTED: Musa acuminata subsp. malaccensis stromal 70 kDa heat shock-related protein, chloroplastic-like (LOC103989312), mRNA	sp|Q02028|HSP7S_PEA/0.0e+00/Stromal 70 kDa heat shock-related protein, chloroplastic OS=Pisum sativum OX=3888 GN=HSP70 PE=2 SV=1	mus:103989312/0.0e+00/stromal 70 kDa heat shock-related protein, chloroplastic-like; K03283 heat shock 70kDa protein 1/2/6/8	At4g24280/0.0e+00/[O] KOG0102 Molecular chaperones mortalin/PBP74/GRP75, HSP70 superfamily	biological_process:GO:0006457//protein folding;molecular_function:GO:0005524//ATP binding;GO:0051082//unfolded protein binding;
Maker00019342.1	64.24	65.58	74.66	65.25	72.21	66.83	69.44	70.31	67.32	60.09	62.21	73.31	67.6208	4.29574	0.0635268	1.24247	Dynamin	Maker00019342.1	XP_009408000.1/0.0e+00/PREDICTED: dynamin-2A-like [Musa acuminata subsp. malaccensis]	XM_009414882.2/0/PREDICTED: Musa acuminata subsp. malaccensis dynamin-2A-like (LOC103994516), mRNA	sp|Q9SE83|DRP2A_ARATH/0.0e+00/Dynamin-2A OS=Arabidopsis thaliana OX=3702 GN=DRP2A PE=1 SV=2	mus:103990541/0.0e+00/dynamin-2A-like; K01528 dynamin GTPase [EC:3.6.5.5]	At1g10290/0.0e+00/[UR] KOG0446 Vacuolar sorting protein VPS1, dynamin, and related proteins	molecular_function:GO:0005525//GTP binding;GO:0003924//GTPase activity;
Maker00015146.1	63.64	66.93	69.04	75.78	64.26	62.08	74.91	65.55	66.3	67.84	75.03	69.75	68.4258	4.45133	0.0650534	1.22068	D6PK	Maker00015146.1	XP_009415445.1/4.2e-252/PREDICTED: serine/threonine-protein kinase D6PK-like [Musa acuminata subsp. malaccensis]	XM_018829992.1/0/PREDICTED: Musa acuminata subsp. malaccensis serine/threonine-protein kinase D6PKL1-like (LOC103981168), transcript variant X6, mRNA	sp|Q39183|D6KL2_ARATH/4.1e-212/Serine/threonine-protein kinase D6PKL2 OS=Arabidopsis thaliana OX=3702 GN=D6PKL2 PE=1 SV=1	mus:103996282/5.8e-253/serine/threonine-protein kinase D6PK-like; K08286 protein-serine/threonine kinase [EC:2.7.11.-]	At5g47750/9.3e-212/[R] KOG0610 Putative serine/threonine protein kinase	molecular_function:GO:0005524//ATP binding;GO:0004672//protein kinase activity;
Maker00077274.1	53.02	55.97	53.39	46.27	48.68	53.51	49.82	56.11	55.84	40.2	49.46	52.19	51.205	4.46656	0.0872291	1.39577	NAD5	Maker00077274.1	XP_009387722.1/2.5e-194/PREDICTED: isocitrate dehydrogenase [NAD] catalytic subunit 5, mitochondrial [Musa acuminata subsp. malaccensis] >XP_009387723.1 PREDICTED: isocitrate dehydrogenase [NAD] catalytic subunit 5, mitochondrial [Musa acuminata subsp. malaccensis]	XM_009389448.2/0/PREDICTED: Musa acuminata subsp. malaccensis isocitrate dehydrogenase [NAD] catalytic subunit 5, mitochondrial (LOC103974592), transcript variant X2, mRNA	sp|Q945K7|IDH5_ARATH/8.6e-176/Isocitrate dehydrogenase [NAD] catalytic subunit 5, mitochondrial OS=Arabidopsis thaliana OX=3702 GN=IDH5 PE=1 SV=1	mus:103974592/3.5e-195/isocitrate dehydrogenase [NAD] catalytic subunit 5, mitochondrial; K00030 isocitrate dehydrogenase (NAD+) [EC:1.1.1.41]	At5g03290/2.0e-175/[E] KOG0785 Isocitrate dehydrogenase, alpha subunit	biological_process:GO:0006099//tricarboxylic acid cycle;cellular_component:GO:0005739//mitochondrion;molecular_function:GO:0000287//magnesium ion binding;GO:0004449//isocitrate dehydrogenase (NAD+) activity;GO:0051287//NAD binding;
MTCONS_00024575	49.36	49.24	51	51.21	60.99	54.38	51.72	60.6	52.16	46.01	54.99	47.36	52.4183	4.48153	0.0854955	1.32558	UCH2	MTCONS_00024575	XP_009391084.1/9.8e-173/PREDICTED: ubiquitin carboxyl-terminal hydrolase 2 [Musa acuminata subsp. malaccensis] >XP_009391085.1 PREDICTED: ubiquitin carboxyl-terminal hydrolase 2 [Musa acuminata subsp. malaccensis] >XP_009391086.1 PREDICTED: ubiquitin carboxyl-terminal hydrolase 2 [Musa acuminata subsp. malaccensis] >XP_009391087.1 PREDICTED: ubiquitin carboxyl-terminal hydrolase 2 [Musa acuminata…	XM_009392813.2/0/PREDICTED: Musa acuminata subsp. malaccensis ubiquitin carboxyl-terminal hydrolase 2 (LOC103977316), transcript variant X6, mRNA	sp|O04482|UCH2_ARATH/1.8e-147/Ubiquitin carboxyl-terminal hydrolase 2 OS=Arabidopsis thaliana OX=3702 GN=UCH2 PE=1 SV=1	mus:103977316/1.3e-173/ubiquitin carboxyl-terminal hydrolase 2; K05610 ubiquitin carboxyl-terminal hydrolase L5 [EC:3.4.19.12]	At1g65650/4.0e-147/[O] KOG2778 Ubiquitin C-terminal hydrolase	biological_process:GO:0006511//ubiquitin-dependent protein catabolic process;GO:0016579//protein deubiquitination;molecular_function:GO:0004843//thiol-dependent ubiquitin-specific protease activity;
Maker00015129.1	86.83	89.32	96.37	87.07	87.38	95.03	88.64	95.22	85.36	82.96	92.5	82.7	89.115	4.4923	0.0504101	1.1653	SERINC	Maker00015129.1	XP_009383181.1/2.0e-227/PREDICTED: probable serine incorporator [Musa acuminata subsp. malaccensis]	XM_009401301.2/0/PREDICTED: Musa acuminata subsp. malaccensis probable serine incorporator (LOC103983942), mRNA	NA	aly:ARALYDRAFT_665390/3.2e-11/hypothetical protein; K11885 DNA damage-inducible protein 1	At1g16180/1.2e-205/[S] KOG2592 Tumor differentially expressed (TDE) protein	cellular_component:GO:0016021//integral component of membrane;
MTCONS_00084856	64.68	65.16	77.47	67.95	73.53	68.36	72.97	63.45	67.72	59.84	66.92	67.74	67.9825	4.58966	0.0675124	1.29462	CLTC	MTCONS_00084856	XP_009396867.1/0.0e+00/PREDICTED: clathrin heavy chain 1-like isoform X2 [Musa acuminata subsp. malaccensis]	XM_009401725.2/0/PREDICTED: Musa acuminata subsp. malaccensis clathrin heavy chain 1 (LOC103984263), mRNA	sp|Q2RBN7|CLH1_ORYSJ/0.0e+00/Clathrin heavy chain 1 OS=Oryza sativa subsp. japonica OX=39947 GN=Os11g0104900 PE=3 SV=1	mus:103981841/0.0e+00/clathrin heavy chain 1-like isoform X1; K04646 clathrin heavy chain	At3g11130/0.0e+00/[U] KOG0985 Vesicle coat protein clathrin, heavy chain	biological_process:GO:0006886//intracellular protein transport;GO:0048268//clathrin coat assembly;GO:0016192//vesicle-mediated transport;cellular_component:GO:0030132//clathrin coat of coated pit;GO:0030130//clathrin coat of trans-Golgi network vesicle;GO:0071439//clathrin complex;molecular_function:GO:0005198//structural molecule activity;GO:0032051//clathrin light chain binding;
MTCONS_00011491	66.34	65.61	63.72	61.37	71.4	59.67	60.49	68.63	67.48	58.69	67.08	54.87	63.7792	4.60881	0.072262	1.30126	CKIIα	MTCONS_00011491	XP_009404777.1/8.0e-193/PREDICTED: casein kinase II subunit alpha-2-like [Musa acuminata subsp. malaccensis]	XM_009406502.2/0/PREDICTED: Musa acuminata subsp. malaccensis casein kinase II subunit alpha-2-like (LOC103988014), mRNA	sp|B6F107|HD6_ORYSJ/2.1e-190/Casein kinase II subunit alpha-2 OS=Oryza sativa subsp. japonica OX=39947 GN=HD6 PE=3 SV=1	mus:103988014/1.1e-193/casein kinase II subunit alpha-2-like; K03097 casein kinase II subunit alpha [EC:2.7.11.1]	At3g50000/9.8e-188/[TDK] KOG0668 Casein kinase II, alpha subunit	molecular_function:GO:0004674//protein serine/threonine kinase activity;GO:0005524//ATP binding;
MTCONS_00039253	53.36	56.24	54.71	50.34	50.8	56.63	51.45	41.99	55.07	44.87	58.19	49.92	51.9642	4.62056	0.0889183	1.38581	CYP21	MTCONS_00039253	XP_009401018.1/1.5e-94/PREDICTED: peptidyl-prolyl cis-trans isomerase CYP21-4-like [Musa acuminata subsp. malaccensis] >XP_009401019.1 PREDICTED: peptidyl-prolyl cis-trans isomerase CYP21-4-like [Musa acuminata subsp. malaccensis] >XP_018682300.1 PREDICTED: peptidyl-prolyl cis-trans isomerase CYP21-4-like [Musa acuminata subsp. malaccensis] >XP_018682301.1 PREDICTED: peptidyl-prolyl cis-trans iso…	NA	sp|Q9C835|CP21D_ARATH/4.9e-71/Peptidyl-prolyl cis-trans isomerase CYP21-4 OS=Arabidopsis thaliana OX=3702 GN=CYP21-4 PE=2 SV=1	mus:104000732/1.5e-93/peptidyl-prolyl cis-trans isomerase CYP21-4-like; K12733 peptidyl-prolyl cis-trans isomerase-like 1 [EC:5.2.1.8]	At3g66654/1.1e-70/[O] KOG0882 Cyclophilin-related peptidyl-prolyl cis-trans isomerase	cellular_component:GO:0016021//integral component of membrane;molecular_function:GO:0003755//peptidyl-prolyl cis-trans isomerase activity;
Maker00003514.1	53.94	54.52	64.8	51.68	50.79	53.03	47.12	63.38	54.81	48.49	54.07	54.9	54.2942	4.99711	0.0920376	1.37521	40S_S15	Maker00003514.1	XP_015939352.1/1.5e-67/40S ribosomal protein S15a-1 [Arachis duranensis] >XP_015958683.1 40S ribosomal protein S15a-1 [Arachis duranensis] >XP_015941479.1 40S ribosomal protein S15a-1 [Arachis duranensis] >XP_015941480.1 40S ribosomal protein S15a-1 [Arachis duranensis] >XP_016196592.1 40S ribosomal protein S15a-1 [Arachis ipaensis] >XP_016197392.1 40S ribosomal protein S15a-1 [Arachis ipaensis] …	XM_009405176.2/1.15297e-126/PREDICTED: Musa acuminata subsp. malaccensis 40S ribosomal protein S15a-like (LOC103987003), mRNA	sp|P42798|R15A1_ARATH/2.8e-68/40S ribosomal protein S15a-1 OS=Arabidopsis thaliana OX=3702 GN=RPS15AA PE=2 SV=2	adu:107464900/2.0e-68/40S ribosomal protein S15a-1; K02957 small subunit ribosomal protein S15Ae	At5g59850/6.3e-68/[J] KOG1754 40S ribosomal protein S15/S22	biological_process:GO:0006412//translation;cellular_component:GO:0005840//ribosome;molecular_function:GO:0003735//structural constituent of ribosome;
MTCONS_00073507	64.73	62.49	67.2	66.58	71.73	61.78	66.95	53.62	70.6	60.51	61.59	55.1	63.5733	5.3183	0.0836561	1.33775	60S	MTCONS_00073507	XP_009408226.1/3.4e-101/PREDICTED: 60S ribosomal protein L19-2 [Musa acuminata subsp. malaccensis]	XM_018831511.1/8.96204e-176/PREDICTED: Musa acuminata subsp. malaccensis uncharacterized LOC103998497 (LOC103998497), mRNA	sp|P49693|RL193_ARATH/2.6e-95/60S ribosomal protein L19-3 OS=Arabidopsis thaliana OX=3702 GN=RPL19C PE=2 SV=3	mus:103990711/4.6e-102/60S ribosomal protein L19-2; K02885 large subunit ribosomal protein L19e	At4g02230/6.0e-95/[J] KOG1696 60s ribosomal protein L19	biological_process:GO:0006412//translation;cellular_component:GO:0022625//cytosolic large ribosomal subunit;molecular_function:GO:0003723//RNA binding;GO:0003735//structural constituent of ribosome;
MTCONS_00038295	56.28	56.53	61.6	49.93	53.23	60.31	45.89	51.93	58.17	42.15	54.4	54.2	53.7183	5.42717	0.10103	1.46145	26S	MTCONS_00038295	XP_009383633.1/1.0e-137/PREDICTED: 26S proteasome non-ATPase regulatory subunit 8 homolog A [Musa acuminata subsp. malaccensis]	XM_009411389.2/0/PREDICTED: Musa acuminata subsp. malaccensis 26S proteasome non-ATPase regulatory subunit 8 homolog A (LOC103991846), mRNA	sp|Q9SGW3|PSD8A_ARATH/5.9e-119/26S proteasome non-ATPase regulatory subunit 8 homolog A OS=Arabidopsis thaliana OX=3702 GN=RPN12A PE=1 SV=1	mus:103971359/1.4e-138/26S proteasome non-ATPase regulatory subunit 8 homolog A; K03031 26S proteasome regulatory subunit N12	At1g64520/1.4e-118/[O] KOG3151 26S proteasome regulatory complex, subunit RPN12/PSMD8	biological_process:GO:0006508//proteolysis;cellular_component:GO:0005838//proteasome regulatory particle;
MTCONS_00082683	50.29	52.12	62.8	51.77	67.43	51	49.22	50.79	54.92	47.34	54.07	55.79	53.9617	5.55744	0.102989	1.42438	E1	MTCONS_00082683	XP_009420363.1/0.0e+00/PREDICTED: ubiquitin-activating enzyme E1 2-like [Musa acuminata subsp. malaccensis] >XP_009420364.1 PREDICTED: ubiquitin-activating enzyme E1 2-like [Musa acuminata subsp. malaccensis]	XM_009422089.2/0/PREDICTED: Musa acuminata subsp. malaccensis ubiquitin-activating enzyme E1 2-like (LOC104000129), transcript variant X2, mRNA	sp|P31251|UBE12_WHEAT/0.0e+00/Ubiquitin-activating enzyme E1 2 OS=Triticum aestivum OX=4565 GN=UBA2 PE=2 SV=1	mus:104000129/0.0e+00/ubiquitin-activating enzyme E1 2-like; K03178 ubiquitin-activating enzyme E1 [EC:6.2.1.45]	At2g30110/0.0e+00/[O] KOG2012 Ubiquitin activating enzyme UBA1	biological_process:GO:0006464//cellular protein modification process;molecular_function:GO:0008641//ubiquitin-like modifier activating enzyme activity;GO:0005524//ATP binding;
MTCONS_00022457	54.84	54.84	49.68	46.02	56.25	62.15	49.92	47.2	60.39	47.91	62.93	54.6	53.8942	5.59774	0.103865	1.36745	RPB7	MTCONS_00022457	XP_009388799.1/4.2e-96/PREDICTED: DNA-directed RNA polymerase II subunit RPB7 isoform X2 [Musa acuminata subsp. malaccensis]	XM_009390524.2/2.48168e-167/PREDICTED: Musa acuminata subsp. malaccensis DNA-directed RNA polymerase II subunit RPB7 (LOC103975523), transcript variant X2, mRNA	sp|P46279|RPB7_SOYBN/1.7e-91/DNA-directed RNA polymerase II subunit RPB7 OS=Glycine max OX=3847 PE=2 SV=1	egu:105054705/3.1e-95/DNA-directed RNA polymerase II subunit RPB7; K03015 DNA-directed RNA polymerase II subunit RPB7	At5g59180/2.9e-86/[K] KOG3298 DNA-directed RNA polymerase subunit E'	biological_process:GO:0006351//transcription, DNA-templated;cellular_component:GO:0005665//RNA polymerase II, core complex;molecular_function:GO:0003899//DNA-directed 5'-3' RNA polymerase activity;GO:0003676//nucleic acid binding;
MTCONS_00075391	54.38	59.77	62.87	58.6	55.08	55.35	55.15	41.79	60.28	53.83	53.67	46.33	54.7583	5.61378	0.102519	1.50443	Pex	MTCONS_00075391	XP_009399015.1/5.5e-129/PREDICTED: peroxisomal membrane protein 13 [Musa acuminata subsp. malaccensis]	XM_009400740.2/6.17345e-159/PREDICTED: Musa acuminata subsp. malaccensis peroxisomal membrane protein 13 (LOC103983526), mRNA	sp|Q9SRR0|PEX13_ARATH/6.7e-92/Peroxisomal membrane protein 13 OS=Arabidopsis thaliana OX=3702 GN=PEX13 PE=1 SV=1	mus:103983526/7.6e-130/peroxisomal membrane protein 13; K13344 peroxin-13	CE25017/1.5e-09/[A] KOG0117 Heterogeneous nuclear ribonucleoprotein R (RRM superfamily)	biological_process:GO:0016560//protein import into peroxisome matrix, docking;cellular_component:GO:0016021//integral component of membrane;GO:0005777//peroxisome;
MTCONS_00027952	62.84	63.69	69.53	56.8	64.24	68.66	56.72	56.61	61.66	48.71	63.24	65.26	61.4967	5.6234	0.0914423	1.42743	β-APB	MTCONS_00027952	XP_009415525.1/0.0e+00/PREDICTED: beta-adaptin-like protein C [Musa acuminata subsp. malaccensis]	XM_009387581.2/0/PREDICTED: Musa acuminata subsp. malaccensis beta-adaptin-like protein B (LOC103973105), mRNA	sp|O81742|APBLC_ARATH/0.0e+00/Beta-adaptin-like protein C OS=Arabidopsis thaliana OX=3702 GN=BETAC-AD PE=1 SV=2	pda:103706977/0.0e+00/beta-adaptin-like protein C isoform X2; K12392 AP-1 complex subunit beta-1	At4g23460/0.0e+00/[U] KOG1061 Vesicle coat complex AP-1/AP-2/AP-4, beta subunit	biological_process:GO:0006886//intracellular protein transport;GO:0016192//vesicle-mediated transport;cellular_component:GO:0030131//clathrin adaptor complex;molecular_function:GO:0030276//clathrin binding;
MTCONS_00067099	63.86	66.38	64.11	64.7	61.45	78.87	62.42	71.45	71.77	61.49	76.83	69.06	67.6992	5.66042	0.0836113	1.28348	RHC1A	MTCONS_00067099	XP_009411718.1/6.0e-126/PREDICTED: probable E3 ubiquitin-protein ligase RHC1A [Musa acuminata subsp. malaccensis] >XP_018686501.1 PREDICTED: probable E3 ubiquitin-protein ligase RHC1A [Musa acuminata subsp. malaccensis]	NA	sp|O22197|RHC1A_ARATH/4.2e-68/Probable E3 ubiquitin-protein ligase RHC1A OS=Arabidopsis thaliana OX=3702 GN=RHC1A PE=2 SV=1	mus:103993396/8.2e-127/probable E3 ubiquitin-protein ligase RHC1A; K11982 E3 ubiquitin-protein ligase RNF115/126 [EC:2.3.2.27]	At2g40830/9.5e-68/[O] KOG0800 FOG: Predicted E3 ubiquitin ligase	molecular_function:GO:0061630//ubiquitin protein ligase activity;
Maker00010686.1	45.47	49.59	60.17	53.38	51.51	63.83	53.75	60.21	56.95	55.02	65.99	54.31	55.8483	5.66216	0.101385	1.45129	acetyl‐CoA	Maker00010686.1	XP_008806855.1/3.7e-269/acetyl-coenzyme A carboxylase carboxyl transferase subunit alpha, chloroplastic-like [Phoenix dactylifera] >XP_008806856.1 acetyl-coenzyme A carboxylase carboxyl transferase subunit alpha, chloroplastic-like [Phoenix dactylifera]	XM_009397858.2/0/PREDICTED: Musa acuminata subsp. malaccensis acetyl-coenzyme A carboxylase carboxyl transferase subunit alpha, chloroplastic (LOC103981213), mRNA	sp|Q9LD43|ACCA_ARATH/1.6e-186/Acetyl-coenzyme A carboxylase carboxyl transferase subunit alpha, chloroplastic OS=Arabidopsis thaliana OX=3702 GN=CAC3 PE=1 SV=1	pda:103719410/5.0e-270/acetyl-coenzyme A carboxylase carboxyl transferase subunit alpha, chloroplastic-like; K01962 acetyl-CoA carboxylase carboxyl transferase subunit alpha [EC:6.4.1.2 2.1.3.15]	NA	biological_process:GO:0006633//fatty acid biosynthetic process;cellular_component:GO:0009317//acetyl-CoA carboxylase complex;molecular_function:GO:0003989//acetyl-CoA carboxylase activity;GO:0016740//transferase activity;
Maker00042628.1	54.1	52.64	69.88	54.11	62.59	58.51	59.61	49.86	54.78	52.76	56.1	47.84	56.065	5.70173	0.101699	1.4607	40S_S3	Maker00042628.1	XP_009401420.1/4.4e-123/PREDICTED: 40S ribosomal protein S3-3 [Musa acuminata subsp. malaccensis] >XP_009401421.1 PREDICTED: 40S ribosomal protein S3-3 [Musa acuminata subsp. malaccensis] >XP_009401422.1 PREDICTED: 40S ribosomal protein S3-3 [Musa acuminata subsp. malaccensis]	XM_009395408.2/0/PREDICTED: Musa acuminata subsp. malaccensis 40S ribosomal protein S3-3-like (LOC103979313), mRNA	sp|Q9FJA6|RS33_ARATH/1.0e-113/40S ribosomal protein S3-3 OS=Arabidopsis thaliana OX=3702 GN=RPS3C PE=1 SV=1	mus:103985449/5.9e-124/40S ribosomal protein S3-3; K02985 small subunit ribosomal protein S3e	At5g35530/2.3e-113/[J] KOG3181 40S ribosomal protein S3	biological_process:GO:0006412//translation;cellular_component:GO:0016021//integral component of membrane;GO:0015935//small ribosomal subunit;molecular_function:GO:0003723//RNA binding;GO:0003735//structural constituent of ribosome;
MTCONS_00086537	50.51	51.14	60.46	48.38	59.25	53.1	51.67	67.53	49.49	46.96	51.87	57.98	54.0283	5.77933	0.106968	1.43803	NAD-ME	MTCONS_00086537	XP_009407834.1/0.0e+00/PREDICTED: NAD-dependent malic enzyme 62 kDa isoform, mitochondrial [Musa acuminata subsp. malaccensis]	XM_009409559.2/0/PREDICTED: Musa acuminata subsp. malaccensis NAD-dependent malic enzyme 62 kDa isoform, mitochondrial (LOC103990429), mRNA	sp|P37221|MAOM_SOLTU/3.4e-299/NAD-dependent malic enzyme 62 kDa isoform, mitochondrial OS=Solanum tuberosum OX=4113 PE=1 SV=1	mus:103990429/0.0e+00/NAD-dependent malic enzyme 62 kDa isoform, mitochondrial; K00028 malate dehydrogenase (decarboxylating) [EC:1.1.1.39]	At2g13560/4.2e-292/[C] KOG1257 NADP+-dependent malic enzyme	molecular_function:GO:0004471//malate dehydrogenase (decarboxylating) (NAD+) activity;GO:0046872//metal ion binding;GO:0051287//NAD binding;
MTCONS_00041752	60.26	56.57	66.7	57.13	61.32	56.57	51.55	42.52	51.66	52.01	53.34	54.89	55.3767	5.79353	0.10462	1.56867	ILR1	MTCONS_00041752	XP_009396760.1/1.7e-205/PREDICTED: IAA-amino acid hydrolase ILR1-like 1 [Musa acuminata subsp. malaccensis]	XM_009398485.2/0/PREDICTED: Musa acuminata subsp. malaccensis IAA-amino acid hydrolase ILR1-like 1 (LOC103981749), mRNA	sp|Q84XG9|ILL1_ORYSI/5.2e-180/IAA-amino acid hydrolase ILR1-like 1 OS=Oryza sativa subsp. indica OX=39946 GN=ILL1 PE=2 SV=1	mus:103981749/2.3e-206/IAA-amino acid hydrolase ILR1-like 1; K21604 jasmonoyl-L-amino acid hydrolase [EC:3.5.1.127]	At1g51760/2.8e-165/[T] LSE0466 A IAA-amino acid hydrolase	molecular_function:GO:0016787//hydrolase activity;
MTCONS_00087476	49.49	54.04	64.36	67.9	63.69	66.72	64.84	53.77	58.66	60.47	68.02	64.73	61.3908	5.87304	0.0956664	1.37442	SKα	MTCONS_00087476	XP_010910596.1/1.6e-214/PREDICTED: shaggy-related protein kinase alpha [Elaeis guineensis] >XP_010921357.2 PREDICTED: shaggy-related protein kinase alpha [Elaeis guineensis]	XM_009405472.2/0/PREDICTED: Musa acuminata subsp. malaccensis shaggy-related protein kinase alpha (LOC103987228), mRNA	sp|P43288|KSG1_ARATH/2.1e-211/Shaggy-related protein kinase alpha OS=Arabidopsis thaliana OX=3702 GN=ASK1 PE=1 SV=3	mus:103987228/5.4e-214/shaggy-related protein kinase alpha; K03083 glycogen synthase kinase 3 beta [EC:2.7.11.26]	At3g05840/6.1e-211/[G] KOG0658 Glycogen synthase kinase-3	molecular_function:GO:0004674//protein serine/threonine kinase activity;GO:0005524//ATP binding;
Maker00022601.1	58.07	52.56	62.16	53.74	43.42	54.41	58.47	44.3	47.36	57.26	47.04	45.8	52.0492	6.02907	0.115834	1.4316	ATPase	Maker00022601.1	XP_008781499.1/1.1e-83/V-type proton ATPase 16 kDa proteolipid subunit [Phoenix dactylifera] >XP_008784205.1 V-type proton ATPase 16 kDa proteolipid subunit [Phoenix dactylifera] >XP_008805578.1 V-type proton ATPase 16 kDa proteolipid subunit [Phoenix dactylifera] >XP_010555255.1 PREDICTED: V-type proton ATPase 16 kDa proteolipid subunit [Tarenaya hassleriana] >XP_010526574.1 PREDICTED: V-type pr…	XM_009406711.2/6.45159e-170/PREDICTED: Musa acuminata subsp. malaccensis V-type proton ATPase subunit c1 (LOC103988168), mRNA	sp|O22552|VATL_VIGRR/1.1e-85/V-type proton ATPase 16 kDa proteolipid subunit OS=Vigna radiata var. radiata OX=3916 PE=2 SV=1	thj:104804109/1.5e-84/V-type proton ATPase 16 kDa proteolipid subunit; K02155 V-type H+-transporting ATPase 16kDa proteolipid subunit	At4g38920/7.2e-85/[C] KOG0232 Vacuolar H+-ATPase V0 sector, subunits c/c'	biological_process:GO:0015991//ATP hydrolysis coupled proton transport;cellular_component:GO:0005774//vacuolar membrane;GO:0033179//proton-transporting V-type ATPase, V0 domain;GO:0016021//integral component of membrane;molecular_function:GO:0015078//proton transmembrane transporter activity;
Maker00021511.1	46.84	47.09	54.86	62.34	62.08	49.07	59.94	58.8	49.49	60.71	50.46	47.46	54.095	6.04003	0.111656	1.33091	SF3B	Maker00021511.1	XP_009419988.1/0.0e+00/PREDICTED: splicing factor 3B subunit 1 [Musa acuminata subsp. malaccensis] >XP_009419989.1 PREDICTED: splicing factor 3B subunit 1 [Musa acuminata subsp. malaccensis]	XR_672812.2/0/PREDICTED: Musa acuminata subsp. malaccensis splicing factor 3B subunit 1 (LOC103999839), transcript variant X4, misc_RNA	NA	mus:103999839/0.0e+00/splicing factor 3B subunit 1; K12828 splicing factor 3B subunit 1	At5g64270/0.0e+00/[A] KOG0213 Splicing factor 3b, subunit 1	NA
