# Supplementary material for: Identification of Reference Genes for Reverse Transcription-Quantitative PCR Analysis of Ginger Under Abiotic Stress and for Postharvest Biology Studies
Source: Front Plant Sci. 2022 Jun 6;13:893495. doi: 10.3389/fpls.2022.893495 (PMC9207462; doi:10.3389/fpls.2022.893495)
Supplement: Supplementary Table 4 — Candidate primer information. [file Data_Sheet_4.XLSX]

## Sheet: S4.Primer Information
序号	Gene	Primer_ID	Primer sequences（5`-3`)	Length	Tm (℃)	Amplicon length (bp)
1	Maker00003514	40S_S15-F	CGAGTTGAATGGCAGGTTG	19	54.3	140
	Maker00003514	40S_S15-R	TTCCCGCCGATGTTGTTA	18	54
2	Maker00010686	acetyl‐CoA-F	ATCTGTTGCTGCTAATAGTCGTAG	24	53.9	222
	Maker00010686	acetyl‐CoA-R	TTTCGCACATCAGCCATC	18	53
3	Maker00015129	SERINC-F	CGCCTTGTCCCTCGTCATC	19	59.1	241
	Maker00015129	SERINC-R	CTTCGCCATCCAACCACC	18	57.1
4	Maker00015146	D6PK-F	GGATGGAAACCAAGCGAATAC	21	53.8	186
	Maker00015146	D6PK-R	GGCGTCCTGCCAAACAAA	18	56.8
5	Maker00019342	Dynamin-F	CAGCTTAATCGGACACCC	18	53.2	213
	Maker00019342	Dynamin-R	CCCTTTCCAGACCCTTG	17	52.8
6	Maker00021511	SF3B-F	AAAAGTTATTGACAGGGTTC	20	46.8	293
	Maker00021511	SF3B-R	CAGCCTTCAGAAATGGTA	18	48.5
7	Maker00022601	ATPase-F	CGTGGGAGATGCTGGAG	17	56.1	119
	Maker00022601	ATPase-R	GGATGATGCCGACAATGAG	19	53.6
8	Maker00042628	40S_S3-F	GGACGGAGTGTTCTTTGC	18	53.9	113
	Maker00042628	40S_S3-R	GGATAATGATCTCGGTTCG	19	49.7
9	Maker00069376	MTN-F	AAACCCTACCCGCACAAG	18	55.4	214
	Maker00069376	MTN-R	CAACCAGCTCATCATAATAACCA	23	52.1
10	Maker00077274	NAD5-F	ACCATGCTACAGCCTTCC	18	54.9	280
	Maker00077274	NAD5-R	AACCTCACGGCAACACTT	18	54.5
11	Maker00077394	26S1-F	ATAATGGCAACAAATCGTG	19	47.5	267
	Maker00077394	26S1-R	CGGAAGAATGACATAGCG	18	50.3
12	MTCONS_00009943	RBP-F	CCTATGAAGCGTAGAAACACAAG	23	53.2	123
	MTCONS_00009943	RBP-R	GGAAGGACAACATCCCAAATC	21	53.6
13	MTCONS_00010202	NCBP-F	GACAACCGAATCACAAGC	18	51.3	100
	MTCONS_00010202	NCBP-R	CAACGAAGGTGGAAGAGC	18	53.7
14	MTCONS_00011491	CKIIα-F	AAGATCCTAAAGCCTGTG	18	48.2	234
	MTCONS_00011491	CKIIα-R	ATCCATTGCCTTGAGTAG	18	48.3
15	MTCONS_00022457	RPB7-F	AGGACGTAGAGGGCACATG	19	57.1	111
	MTCONS_00022457	RPB7-R	GAAAGGTCACGAAGCCAGTT	20	55.4
16	MTCONS_00024575	UCH2-F	AAGGAGGGTCCAATCAGC	18	54.6	217
	MTCONS_00024575	UCH2-R	TCAGTTGCAGCACAAGGTG	19	56
17	MTCONS_00027952	β-APB-F	TACTGAACCTCCCTTACCTG	20	53.1	142
	MTCONS_00027952	β-APB-R	GAACCCATCTAATACACCCT	20	50.7
18	MTCONS_00038295	26S2-F	AGGCTTATGATTATTTGTCC	20	46.2	178
	MTCONS_00038295	26S2-R	AGTTGTAGTGCTGGTATTTCT	21	50.3
19	MTCONS_00039253	CYP21-F	AAGGGAAATCGCAGCACC	18	56	301
	MTCONS_00039253	CYP21-R	CTGAACCGAAGAGGAACACG	20	56
20	MTCONS_00041752	ILR1-F	TCACCATTGACGGCAGAG	18	55	244
	MTCONS_00041752	ILR1-R	ATGTTTGGCTACCTTGGATTT	21	51.5
21	MTCONS_00060008	CCR-F	TAGGGTGGAATCACAGGACG	20	56.6	152
	MTCONS_00060008	CCR-R	TCGCATAGGAGGGAAACAGA	20	55.4
22	MTCONS_00067099	RHC1A-F	GAGAAGTCAATAGAAGAGGGTG	22	52.1	175
	MTCONS_00067099	RHC1A-R	ATTCCAGCAAAGTGGTTCA	19	51.4
23	MTCONS_00073507	60S-F	GGATGCGAGTCTTGAGGC	18	56.5	127
	MTCONS_00073507	60S-R	TCCATGAGGACCCGTTTG	18	54.8
24	MTCONS_00075391	Pex-F	GGCATGGGAGGTCCTTATG	19	55.7	286
	MTCONS_00075391	Pex-R	GTCCTGGTTGCTGCTGATT	19	55.6
25	MTCONS_00078691	HSP70-F	TTTTGATTAGGGTTTGCG	18	47	289
	MTCONS_00078691	HSP70-R	GAGTTAGTGGTGCCGAGA	18	54.1
26	MTCONS_00082683	E1-F	TATGGACGGGAGACGATG	18	53.7	142
	MTCONS_00082683	E1-R	TTTCCACATTCCCTTCGT	18	50.6
27	MTCONS_00084856	CLTC-F	TTCTTACCACTAATCCCTACTATG	24	50.4	108
	MTCONS_00084856	CLTC-R	CATCATCACATTGACCTCGT	20	52
28	MTCONS_00086537	NAD-ME-F	CTTCGTGACCCACTTTATTTAG	22	50.6	153
	MTCONS_00086537	NAD-ME-R	TTTGAATGCCCACTTGCT	18	51.9
29	MTCONS_00087476	SKα-F	GCAGATCCCACCTAACCC	18	55.7	134
	MTCONS_00087476	SKα-R	CTTTGTCCGCAATCCCTA	18	51.8
30	MTCONS_00075774	PP2A2-F	TCGGGACCTTTGCTTGCC	18	59	105
	MTCONS_00075774	PP2A2-R	GCTTTCACCTCCGCCTCA	18	58.4
31	Maker00037704	TUBA4-F	TCCCTGAAATCACAAATGC	19	49.9	223
	Maker00037704	TUBA4-R	ACAGATGGCGGCTGGTAG	18	57.9
32	Maker00053704	LOS1-F	CCAAGACGAGGCTGAACG	18	56.6	143
	Maker00053704	LOS1-R	GCCCAGGTGAATCTATGAGG	20	55.3
33	MTCONS_00041075	UBC35-F	CCAAATCCAGATGACCCTC	19	52.8	242
	MTCONS_00041075	UBC35-R	CCAACCCAAGATAATGATACAA	22	49.3
34	MTCONS_00059263	SAM-Mtase-F	GCGACAGGAAGAAGTTGAAG	20	53.6	240
	MTCONS_00059263	SAM-Mtase-R	GCTTTATGCGAAGGTGGA	18	52.4
35	Maker00078606	ACT1-F	TGAAACCACCTATAACTCCATC	22	51.2	207
	Maker00078606	ACT1-R	GAGCCTCCAATCCAAACAC	19	53.8
36	Maker00052044	ACT2-F	CAACCCAAAGGCAAACAG	18	51.9	144
	Maker00052044	ACT2-R	CCATCTCCCGAATCAAGC	18	53.3
37	MTCONS_00024331	TPL40B-F	GACCCTCGCTGACTACAAC	19	55.6	147
	MTCONS_00024331	TPL40B-R	AGACGTGCATAACACTTTC	19	49.5
38	MTCONS_00009409	UBC10-F	CGACGAATCTAAGAAGGG	18	49.3	129
	MTCONS_00009409	UBC10-R	AAAGCAGGAGCACAAATC	18	50
39	MTCONS_00021111	UBC9-F	TCTAGGTTCATCGTCCCAG	19	53.3	191
	MTCONS_00021111	UBC9-R	AACTAAGGCATAAATGTTGAGA	22	48.4
40	MTCONS_00030237	TUBB8-F	CTACTTTCATTGGCAACTCTACC	23	53.1	131
	MTCONS_00030237	TUBB8-R	GAACTCCATCTCGTCCATACC	21	54.9
41	MTCONS_00081884	Clathrin-F	TGCTTTCTTTCTGGGATG	18	49.1	229
	MTCONS_00081884	Clathrin-R	CCTCGGTTATACGATACTTCA	21	50.6
42	MTCONS_00049296	EF1alpha-F	ACGCCTTCGTGCCCTTAG	18	61.1	115
	MTCONS_00049296	EF1alpha-R	CCGTTCCTCCACCTCCTGT	19	63.2
