# Supplementary material for: Identification of Reference Genes for Reverse Transcription-Quantitative PCR Analysis of Ginger Under Abiotic Stress and for Postharvest Biology Studies
Source: Front Plant Sci. 2022 Jun 6;13:893495. doi: 10.3389/fpls.2022.893495 (PMC9207462; doi:10.3389/fpls.2022.893495)
Supplement: Supplementary Table 5 — Fengtoujiang Cq values. [file Data_Sheet_5.XLSX]

## Sheet: S5.Fengtoujiang CT Value
Treatment	Sample code	40S_S15	acetyl‐CoA	SERINC	D6PK	Dynamin	SF3B	ATPase	40S_S3	MTN	NAD5	26S1	RBP	CKIIα	RPB7	UCH2	β-APB	26S2	CYP21	ILR1	CCR	RHC1A	60S	Pex	CLTC	NAD-ME	TUBA4	LOS1	UBC35	ACT1	ACT2	TPL40B	Clathrin
5d-cold-leaf	2	25.09	26.22	27.1933	26.2833	26.4967	25.5033	23.1633	24.64	29.31	25.8333	25.7467	25.6467	25.5233	27.5033	25.3933	27.1967	25.3567	26.7067	24.9467	25.17	25.73	22.9067	24.4467	24.5433	25.4567	23.0033	24.6667	25.99	31.1033	22.5633	23.2267	25.0933
5d-NaCl-rootstock	4	23.5233	23.5933	22.44	25.0233	24.2233	23.08	21.3367	23.0267	26.0967	23.76	22.63	23.95	24.55	24.98	23.4033	24.0233	24.5033	24.72	23.1867	23.6367	24.6167	23.3133	24.49	24.5167	24.3	21.7967	24.63	25.52	29.18	22.4667	23.7133	25.54
5d-NaCl-leaf	5	25.56	24.4233	25.44	25.5767	25.33	24.5033	22.5833	24.7067	28.1533	25.1933	25.1733	24.9167	25.0833	26.46	25.24	26.0633	25.17	25.8533	24.8933	25.37	25.1533	24.4333	24.9567	24.82	25.8567	23.81	25.8	26.1167	30.1133	23.42	24.54	25.7467
5d-drought-root	6	25.14	27.09	25.63	27.4333	26.98	26.1633	23.1633	24.59	28.91	26.9833	26.7533	26.6	26.6133	27.7333	26.68	26.7267	26.0333	27.63	26.09	25.7	27.3033	24.1133	26.2733	25.9333	26.2033	21.7567	25.71	27.22	29.2833	23.4333	24.52	27.3833
5d-cold-stem	7	23.6733	23.3667	23.1667	23.8933	24.5467	22.72	21.5233	22.6767	27.1033	23.7333	22.61	23.9333	24.4033	24.8033	23.2067	24.7633	24.2633	25.12	23.08	23.1267	23.9267	22.1333	24.0567	23.9233	24.2033	19.84	24.09	25.36	28.26	21.76	22.76	24.4367
5d-CK-leaf	8	23.7033	23.6067	24.2467	24.4533	24.6633	23.22	21.0833	23.08	26.1067	23.5333	22.36	23.6567	22.9867	24.7933	23.11	24.14	23.92	24.3733	22.8533	23.3333	24.4	22.8333	24.1833	23.71	24.2167	20.8067	25.5367	25.5125	31.0733	22.1467	23.32	25.3633
5d-heat-rootstock	9	25.0267	24.4133	24.2433	24.3867	24.49	23.23	22.1133	25.1867	27.5067	24.8767	22.23	24.1933	24.2567	25.11	25.6733	24.6233	24.6933	24.35	25.9633	25.24	24.92	36.1167	34.3667	36.7067	35.4833	33.2767	36.57			35.8567	37.1567	39.1567
5d-waterflooding-leaf	10	25.1367	24.3967	24.17	25.0033	25.2033	23.5933	21.3833	23.9867	26.8367	24.1633	22.8933	24.0867	23.76	25.0133	24.1567	24.5333	24.3833	24.93	23.23	23.8133	24.3867	23.6133	24.2	24.08	24.3033	20.27	25.95	25.6467	30.6067	22.2225	24.0033	25.2533
5d-drought-leaf	13	25.52	24.48	24.4933	24.9633	25.3467	24.2467	21.9967	24.2333	26.6733	24.3667	22.99	24.2167	23.61	24.97	23.94	24.73	24.6133	25.0067	23.58	24.1267	24.9167	22.9667	23.7867	24.0467	23.88	20.3833	25.97	24.8533	30.7133	22.2933	23.3133	24.6667
5d-heat-leaf	15	26.3267	26.37	27.39	25.53	26.2233	24.0333	22.3267	24.8967	28.7167	26.2467	24.6933	25.6933	24.71	26.6533	26.9067	27.4033	25.07	26.0933	26.2167	28.1033	26.6067	24.5933	26.7533	26.1167	30.33	25.4767	26.7967	27.4633	30.8433	25.3967	25.0933	27.1367
5d-cold-rootstock	16	28.44	29.88	27.8333	29.2467	29.35	27.54	26.0167	27.3567	32.6467	30.53	27.8467	28.3367	30.71	29.97	29.9933	30.2067	29.34	30.9967	27.0733	27.64	28.69	27.9933	29.6433	30.14	30.2433	25.53	29.03	31.11	32.3167	26.7933	28.4867	31.93
5d-cold-root	17	28.1367	28.79	27.5233	28.4267	28.61	27.19	24.8167	26.74	31.6867	28.8467	27.95	27.8167	28.8833	28.5833	27.8467	29.12	27.8133	29.0367	27.2333	26.74	27.7667	25.92	27.2967	26.8867	28.05	23.1433	27.8633	28.9367	31.1	25.0033	26.4633	28.0533
5d-CK-rootstock	18	27.33	28.6133	27.1567	28.76	27.8267	27.83	24.9533	26.7067	30.5	28.8	27.4167	27.36	29.2367	29.5933	27.7733	28.06	27.8167	29.4733	26.5067	27.4733	29.19	26.63	28.3033	27.65	27.5533	23.3967	28.62	29.3467	30.9433	25.0533	27.3033	29.4233
5d-waterflooding-root	19	27.7533	28.3233	27.1433	30.0667	28.2233	27.93	25.03	27.0733	31.13	28.04	27.57	27.8533	28.2033	28.6833	27.6667	27.5667	28.68	28.3233	27.9533	27.1567	27.26	25.87	27.0433	26.71	27.0733	22.2633	27.94	28.2467	30.0733	24.1833	26.4033	27.6767
5d-drought-rootstock	20	26.9533	28.39	27.0333	29.01	28.2967	27.79	24.8033	26.85	30.3233	28.5233	26.6967	27.4467	28.9	29.4167	28.02	28.1	28.1567	29.3333	26.7933	27.2333	28.63	25.74	27.5367	27.1833	27.1767	23.6467	27.39	28.51	30.9733	24.6867	26.2767	28.9867
5d-heat-root	21	29.5933	32.1333	31.3	31.44	31.02	29.1367	27.4433	30.2267	35.6667	32.8933	29.5833	30.8067	31.7	31.3533	33.5933	31.91	30.4533	31.75	31.8367	32.0367	35.09	29.0467	29.2	29.8367	32.4067	26.0667	30.58	30.99	32.55	28.06	29.9367	32.1867
5d-waterflooding-rootstock	22	26.17	27.6933	26.05	28.07	27.0033	26.6233	23.7667	25.53	29.7633	27.49	26.03	26.5633	27.5667	28.1867	26.84	27.0167	27.3233	28.2233	26.1033	26.0167	27.9067	24.72	26.8567	25.9733	26.0533	21.7533	26.9533	27.74	29.1967	23.3267	25.39	27.31
5d-NaCl-root	23	30.18	31.54	28.71	31.0533	30.9833	30.28	26.5433	29.56	34.0433	31.8967	30.8733	29.8867	31.92	31.0133	31.4867	30.6367	30.94	31.47	29.2867	29.6233	29.74	28.4867	28.2467	28.72	29.1275	25.6367	29.76	29.77	33.9733	26.4733	29.2367	30.51
5d-CK-root	24	26.7567	28.3533	26.15	28.7433	27.9467	27.03	24.1567	26.31	30.3467	27.9233	27.1467	27.53	28.0767	28.1133	27.8367	27.6367	27.91	29.06	26.7667	27.0267	27.3167	25.3667	26.51	26.2667	26.28	21.3267	27.2467	28.0067	29.9267	23.6167	25.6	28.0433
