# Supplementary material for: Identification of Reference Genes for Reverse Transcription-Quantitative PCR Analysis of Ginger Under Abiotic Stress and for Postharvest Biology Studies
Source: Front Plant Sci. 2022 Jun 6;13:893495. doi: 10.3389/fpls.2022.893495 (PMC9207462; doi:10.3389/fpls.2022.893495)
Supplement: Supplementary Table 6 — Other cultivars Cq values. [file Data_Sheet_6.XLSX]

## Sheet: S6.Other Cultivars CT Value
Cultivar	Treatment	RBP	ATPase	40S-S3	Dynamin
Yunnanluopingxiaohuangjiang	5d-NaCl-leaf	23.94	23.0633	25.3133	24.8367
	5d-CK-leaf	25.4633	23.5067	25.5933	26.2867
	5d-cold-leaf	24.6633	22.9433	23.93	25.0833
	5d-heat-leaf	25.6967	24.3533	25.4967	27
	5d-waterflooding-leaf	26.05	23.3767	26.3333	27.0433
	5d-drought-leaf	24.24	23.6	25.5233	26.4167
	5d-waterflooding-root	30.36	29.2567	31.23	30.0867
	5d-drought-root	29.5333	27	28.6633	29.4933
	5d-heat-root	31.9333	31.09	31.8433	32.29
	5d-CK-root	29.15	27.2767	29.1067	29.3867
	5d-NaCl-root	40.915	35.695	37.35	34.67
	5d-cold-root	36.99	37.2733	39.6533	38.6867
	5d-heat-rootstock	36.96	35.37	38.55	36.9933
	5d-NaCl-rootstock	26.0633	23.1567	25.79	26.1267
	5d-CK-rootstock	29.4533	27.1533	29.9067	28.7433
	5d-drought-rootstock	33.5067	34.0333	34.2467	33.1433
	5d-waterflooding-rootstock	33.44	30.5333	33.7733	31.2733
	5d-cold-rootstock		36.135	36.3767	35.6967
Shandongdajiang	5d-heat-leaf	28.32	25.66	28.0633	31.2433
	5d-cold-leaf	27.5167	25.2733	26.8433	29.79
	5d-drought-leaf	32.4533	30.1233	31.7633	33.2967
	5d-NaCl-leaf	31.2767	28.9767	31.05	32.8467
	5d-waterflooding-leaf	30.0133	28.46	30.2867	32.46
	5d-CK-leaf	29.3033	27.5633	30.01	32.7467
	5d-NaCl-rootstock	31.0033	29.2767	29.7933	33.85
	5d-drought-rootstock	29.4633	29.0633	31.2633	33.1933
	5d-CK-rootstock	29.2033	27.9167	29.7367	32.21
	5d-heat-rootstock	29.1267	27.9933	30.2133	32.6533
	5d-cold-rootstock	29.1433	26.6433	27.8767	31.6867
	5d-waterflooding-rootstock	29.28	27.9333	29.9433	32.08
	5d-NaCl-root	29.85	28.1733	30.1567	32.0033
	5d-waterflooding-root	30.6767	28.9	30.0233	32.1867
	5d-drought-root	32.36	29.2167	31.0433	33.1033
	5d-CK-root	33.0167	30.86	31.7333	33.9333
	5d-heat-root	33.86	32.16	33.53	35.6767
	5d-cold-root	30.5667	28	28.63	32.88
