# Supplementary material for: Identification of Reference Genes for Reverse Transcription-Quantitative PCR Analysis of Ginger Under Abiotic Stress and for Postharvest Biology Studies
Source: Front Plant Sci. 2022 Jun 6;13:893495. doi: 10.3389/fpls.2022.893495 (PMC9207462; doi:10.3389/fpls.2022.893495)
Supplement: Supplementary Table 7 — PR and MYB primer information. [file Data_Sheet_7.XLSX]

## Sheet: MYB genes Primer Information
Gene	Primer_ID	Primer sequences（5`-3`)	Length	Tm (℃)	Amplicon length (bp)
Myb54.1	c55854_g1-F	CTCGTCGTCGTAGCTCCATC	20	57.9	198
Myb54.1	c55854_g1-R	GCGCGCTGATGATAAATCCC	20	57.1
Myb29.1	c49329_g1-F	AGCGTGGATGACATCTGGTC	20	57.4	157
Myb29.1	c49329_g1-R	TGGGAGGAAGCCACAGTGAT	20	58.8
Myb24.5	c66024_g5-F	ATTTGATGCATGCGCCATCG	20	57	194
Myb24.5	c66024_g5-R	GCTCTCCATCTCGTCTTCCG	20	58.1
Myb09.1	c56909_g1-F	TCGGCATGGAGTTGGATCAC	20	57.7	147
Myb09.1	c56909_g1-R	GTTGCGCGGATGTATGTGTG	20	57.4
Myb52.2	c53852_g2-F	AATTCGACGAGCCACCTGTT	20	56.3	109
Myb52.2	c53852_g2-R	GGCTGAACTATCTCCGTCCG	20	56.4
Myb40.1	c60640_g1-F	ATCCCATGGACCGAAGAGGA	20	58.1	138
Myb40.1	c60640_g1-R	ATACTTTTGCGCGTGGCTTG	20	56.7
Myb91.1	c59591_g1-F	GATCAGCCGGTCTATTCCCG	20	58.2	196
Myb91.1	c59591_g1-R	CTTTATGGCGTTGTCGGTGC	20	57.4

## Sheet: PR genes Primer Information
Gene	Primer sequences（5`-3`)	Length	Tm (℃)	Amplicon length (bp)
NbRbohA	F:GACTCGTTCCAGCGCTCATA	20	58.7	138
	R:TGTGCGAAATCGGAACGGTA	20	58.2
WRKY7	F:CACAAGGGTACAAACAACACAG	22	55.7	123
	R:GGTTGCATTTGGTTCATGTAAG	22	57.6
WRKY8	F:AACAATGGTGCCAATAATGC	20	56	144
	R:TGCATATCCTGAGAAACCATT	21	54.9
