# Supplementary material for: Identification of Reference Genes for Reverse Transcription-Quantitative PCR Analysis of Ginger Under Abiotic Stress and for Postharvest Biology Studies
Source: Front Plant Sci. 2022 Jun 6;13:893495. doi: 10.3389/fpls.2022.893495 (PMC9207462; doi:10.3389/fpls.2022.893495)
Supplement: Supplementary Table 8 — PR and MYB Cq values. [file Data_Sheet_8.XLSX]

## Sheet: PR dehydration 0-28d Cq Values 
	0d						7d						14d						21d						28d
	RBP	ATPase	40S-S3	RBP/ATPase	ATPase/40S-S3	RBP/40S-S3	RBP	ATPase	40S-S3	RBP/ATPase	ATPase/40S-S3	RBP/40S-S3	RBP	ATPase	40S-S3	RBP/ATPase	ATPase/40S-S3	RBP/40S-S3	RBP	ATPase	40S-S3	RBP/ATPase	ATPase/40S-S3	RBP/40S-S3	RBP	ATPase	40S-S3	RBP/ATPase	ATPase/40S-S3	RBP/40S-S3
NbRbohA	1.00039	1.00005	1.00562	1.00004	1.00169	1.00077	1.22392	0.695985	0.572029	0.922927	0.630915	0.83671	1.19572	0.851842	0.656615	1.00919	0.747746	0.886035	5.19298	10.0461	5.72935	7.22273	7.58669	5.4545	2.71338	2.21318	1.94609	2.45017	2.07528	2.29781
WRKY7	1.00094	1.0006	1.00617	1.00059	1.00223	1.00131	0.880185	0.50052	0.411377	0.663726	0.453725	0.601723	1.07239	0.763978	0.588888	0.905096	0.670619	0.794644	1.27806	2.47249	1.41007	1.77761	1.86719	1.34243	2.00149	1.63253	1.43551	1.80734	1.53081	1.69496
WRKY8	1.00915	1.00881	1.01442	1.00879	1.01045	1.00952	1.29223	0.734832	0.603958	0.974441	0.666131	0.883413	1.28858	0.917995	0.707607	1.08756	0.805815	0.954844	2.03701	3.94071	2.2474	2.8332	2.97597	2.13959	2.83347	2.31113	2.03222	2.55861	2.16713	2.39951

## Sheet:  MYB dehydration 7d Cq Values
	RBP	ATPase	40S-S3	RBP/ATPase	ATPase/40S-S3	RBP/40S-S3
Myb54.1	1.78813	4.2945	1.25956	3.04132	2.77703	1.52385
Myb29.1	1.03878	2.49481	0.731719	1.76679	1.61326	0.88525
Myb24.5	1.30757	3.14036	0.901152	2.22397	2.02075	1.10436
Myb09.1	1.91166	4.59116	1.34657	3.25141	2.96887	1.62911
Myb52.2	36.6485	88.0174	25.8152	62.333	56.9163	31.2319
Myb40.1	6.54345	15.7152	4.60921	11.1293	10.1622	5.57633
Myb91.1	9.12421	21.9133	6.42711	15.5188	14.1702	7.77566

## Sheet:  MYB infection 7d Cq Values
	RBP	ATPase	40S-S3	RBP/ATPase	ATPase/40S-S3	RBP/40S-S3
Myb54.1	2.69258	8.51614	3.5248	5.60436	6.02047	3.10869
Myb29.1	25.9054	81.9341	33.9123	53.9197	57.9232	29.9088
Myb24.5	39.4648	124.82	51.6626	82.1423	88.2412	45.5637
Myb09.1	15.0327	47.5455	19.679	31.2891	33.6123	17.3558
Myb52.2	15.7316	49.7563	20.594	32.744	35.1752	18.1628
Myb40.1	11.7982	37.3156	15.4448	24.5569	26.3802	13.6215
Myb91.1	12.0003	37.9547	15.7093	24.9775	26.832	13.8548
